# Supplementary material for: Tracking transcription factor mobility and interaction in Arabidopsis roots with fluorescence correlation spectroscopy
Source: eLife journal article supplement (doi:10.7554/elife.14770), 2016-06-11
Supplement: supp [file elife-14770-supp-v1.zip]

Archive with 29 entries (29 files):
- elife_poa_e14770_Figure_1_figure_supplement_1.tif
- elife_poa_e14770_Figure_3_source_data_1.xlsx
- elife_poa_e14770_Figure_4_source_data_2.xlsx
- elife_poa_e14770_Figure_3_source_data_2.xlsx
- elife_poa_e14770_Supplementary_File_2.xlsx
- elife_poa_e14770_Figure_5_figure_supplement_1.tif
- elife_poa_e14770_Figure_5_source_data_1.xlsx
- elife_poa_e14770_Figure_4_figure_supplement_2.tif
- elife_poa_e14770_Supplementary_File_3.pdf
- elife_poa_e14770_Table_2_source_data_2.xlsx
- elife_poa_e14770_Figure_1_source_data_3.xlsx
- elife_poa_e14770_Supplementary_File_4.txt
- elife_poa_e14770_Figure_5_figure_supplement_2.tif
- elife_poa_e14770_Figure_1_source_data_4.xlsx
- elife_poa_e14770_Supplementary_File_4.txt
- elife_poa_e14770_Supplementary_File_1.xlsx
- elife_poa_e14770_Figure_2_source_data_1.xlsx
- elife_poa_e14770_Table_2_source_data_1.xlsx
- elife_poa_e14770_Supplementary_File_4.pdf
- elife_poa_e14770_Table_2_source_data_3.xlsx
- elife_poa_e14770_Supplementary_File_3.tex
- elife_poa_e14770_Figure_4_figure_supplement_1.tif
- elife_poa_e14770_Figure_1_source_data_1.xlsx
- elife_poa_e14770_Figure_1_source_data_2.xlsx
- elife_poa_e14770_Figure_4_source_data_1.xlsx
- elife_poa_e14770_Figure_5_source_data_2.xlsx
- elife_poa_e14770_Figure_2_source_data_2.xlsx
- elife_poa_e14770_Figure_2_figure_supplement_1.tif
- elife_poa_e14770_Figure_3_source_data_3.xlsx
