# Supplementary material for: Tracking transcription factor mobility and interaction in Arabidopsis roots with fluorescence correlation spectroscopy
Source: eLife journal article supplement (doi:10.7554/elife.14770), 2016-06-11
Supplement: supp [file elife-14770-supp-v1.zip › elife_poa_e14770_Figure_1_source_data_1.xlsx]

## Sheet: Fig 1 SD 1- 35SGFP RICS
Filename	Instrument	Location	Pixel Size (μm)	PSF (μm)	Diffusion coefficient (μm2/sec)
35SGFP_780_1	Zeiss 780	NA	0.05	0.24	6.36
35SGFP_780_2	Zeiss 780	Endodermis	0.05	0.24	8.1
35SGFP_780_3	Zeiss 780	Vasculature	0.05	0.24	5.57
35SGFP_780_4	Zeiss 780	SCN	0.05	0.24	4.53
35SGFP_780_5	Zeiss 780	NA	0.1	0.24	7.64
35SGFP_780_6	Zeiss 780	Vasculature	0.1	0.24	5.1
35SGFP_780_7	Zeiss 780	Vasculature	0.1	0.24	6.67
35SGFP_780_8	Zeiss 780	Vasculature	0.1	0.24	6.65
35SGFP_780_9	Zeiss 780	Vasculature	0.1	0.24	7
35SGFP_780_10	Zeiss 780	Vasculature	0.05	0.24	7.05
35SGFP_780_11	Zeiss 780	Vasculature	0.05	0.24	7.75
35SGFP_780_12	Zeiss 780	Vasculature	0.1	0.24	5.09
35SGFP_780_13	Zeiss 780	Vasculature	0.05	0.24	7.25
35SGFP_780_14	Zeiss 780	Vasculature	0.05	0.24	6.22
				Average:	6.49857
				SD:	1.08771
				SE:	0.290702
Filename	Instrument	Location	Pixel Size (μm)	PSF (μm)	Diffusion coefficient (μm2/sec)
35SGFP_710_1	Zeiss 710	Vasculature	0.05	0.241	5.577
35SGFP_710_2	Zeiss 710	SCN	0.1	0.241	8.92
35SGFP_710_3	Zeiss 710	SCN	0.1	0.336	9.07
35SGFP_710_4	Zeiss 710	SCN	0.1	0.336	7.01
35SGFP_710_5	Zeiss 710	SCN	0.1	0.336	9.07
35SGFP_710_6	Zeiss 710	SCN	0.1	0.336	10.91
35SGFP_710_7	Zeiss 710	SCN	0.1	0.336	4.4
35SGFP_710_8	Zeiss 710	SCN	0.1	0.336	4.29
35SGFP_710_9	Zeiss 710	SCN	0.1	0.336	5.32
35SGFP_710_10	Zeiss 710	SCN	0.1	0.336	4.28
35SGFP_710_11	Zeiss 710	SCN	0.1	0.336	11.3
35SGFP_710_12	Zeiss 710	SCN	0.1	0.336	6.49
35SGFP_710_13	Zeiss 710	SCN	0.1	0.336	7.82
35SGFP_710_14	Zeiss 710	SCN	0.1	0.336	7.82
35SGFP_710_15	Zeiss 710	SCN	0.1	0.241	4.3
35SGFP_710_16	Zeiss 710	SCN	0.1	0.241	3.62
35SGFP_710_17	Zeiss 710	SCN	0.1	0.241	3.15
35SGFP_710_18	Zeiss 710	SCN	0.1	0.241	5.55
35SGFP_710_19	Zeiss 710	Vasculature	0.1	0.241	2.99
35SGFP_710_20	Zeiss 710	Vasculature	0.1	0.241	2.44
				Average:	6.21635
				SD:	2.65786
				SE:	0.594315
				Grand Mean	6.33256
				Grand SD	2.13383
				Grand SE	0.365949
