# Supplementary material for: Tracking transcription factor mobility and interaction in Arabidopsis roots with fluorescence correlation spectroscopy
Source: eLife journal article supplement (doi:10.7554/elife.14770), 2016-06-11
Supplement: supp [file elife-14770-supp-v1.zip › elife_poa_e14770_Figure_1_source_data_2.xlsx]

## Sheet: Fig 1 SD 2- SHR RICS
Filename	Instrument	Location	ROI size (pixels)	Pixel Size (μm)	PSF (μm)	Diffusion coefficient (μm2/sec)
SHRSHRGFP_780_Vasc_1	Zeiss 780	Vasculature & endodermis	N/A	0.1	0.24	3.08
SHRSHRGFP_780_Vasc_2	Zeiss 780	Vasculature & endodermis	N/A	0.1	0.24	7.65
SHRSHRGFP_780_Vasc_3	Zeiss 780	Vasculature	N/A	0.05	0.24	1.4
SHRSHRGFP_780_Vasc_4	Zeiss 780	Vasculature	N/A	0.1	0.24	1.73
SHRSHRGFP_780_Vasc_5	Zeiss 780	Vasculature & endodermis	N/A	0.1	0.24	1.3
SHRSHRGFP_780_Vasc_6	Zeiss 780	Vasculature & endodermis	N/A	0.1	0.24	1.27
SHRSHRGFP_780_Vasc_7	Zeiss 780	Vasculature & endodermis	128x128	0.1	0.24	5.83
SHRSHRGFP_780_Vasc_8	Zeiss 780	Vasculature & endodermis	N/A	0.05	0.24	1.58
SHRSHRGFP_780_Vasc_9	Zeiss 780	Vasculature & endodermis	N/A	0.05	0.24	2.12
SHRSHRGFP_780_Vasc_10	Zeiss 780	Vasculature & endodermis	N/A	0.05	0.24	1.52
SHRSHRGFP_780_Vasc_11	Zeiss 780	Vasculature & endodermis	N/A	0.1	0.24	1.39
SHRSHRGFP_780_Vasc_12	Zeiss 780	Vasculature & endodermis	N/A	0.1	0.24	1.86
SHRSHRGFP_780_Vasc_13	Zeiss 780	Vasculature & endodermis	128x128	0.1	0.24	3.12
SHRSHRGFP_780_Vasc_14	Zeiss 780	Vasculature & endodermis	128x128	0.1	0.24	4.14
SHRSHRGFP_780_Vasc_15	Zeiss 780	Vasculature & endodermis	N/A	0.1	0.24	7.51
SHRSHRGFP_780_Vasc_16	Zeiss 780	Vasculature & endodermis	N/A	0.1	0.24	4.27
SHRSHRGFP_780_Vasc_17	Zeiss 780	Vasculature & endodermis	N/A	0.1	0.24	2.64
SHRSHRGFP_780_Vasc_18	Zeiss 780	Vasculature & endodermis	128x128	0.1	0.24	1.56
SHRSHRGFP_780_Vasc_19	Zeiss 780	Vasculature & endodermis	N/A	0.1	0.24	1.69
SHRSHRGFP_780_Vasc_20	Zeiss 780	Vasculature & endodermis	N/A	0.1	0.24	1.17
SHRSHRGFP_780_Vasc_21	Zeiss 780	Vasculature & endodermis	128x128	0.1	0.24	3.33
SHRSHRGFP_780_Vasc_22	Zeiss 780	Vasculature & endodermis	N/A	0.1	0.24	1.61
SHRSHRGFP_780_Vasc_23	Zeiss 780	Vasculature & endodermis	128x128	0.1	0.24	1.28
SHRSHRGFP_780_Vasc_24	Zeiss 780	Vasculature	N/A	0.05	0.24	2.64
SHRSHRGFP_780_Vasc_25	Zeiss 780	Vasculature	N/A	0.05	0.24	1.5
SHRSHRGFP_780_Vasc_26	Zeiss 780	Vasculature	N/A	0.05	0.24	1.25
SHRSHRGFP_780_Vasc_27	Zeiss 780	Vasculature	N/A	0.05	0.24	1.02
SHRSHRGFP_780_Vasc_28	Zeiss 780	Vasculature	N/A	0.05	0.24	1.2
SHRSHRGFP_780_Vasc_29	Zeiss 780	Vasculature & endodermis	N/A	0.05	0.24	1.74
SHRSHRGFP_780_Vasc_30	Zeiss 780	Vasculature	N/A	0.05	0.24	1.28
					Average:	2.456
					SD:	1.78472
					SE:	0.0594907
Filename	Instrument	Location	ROI size (pixels)	Pixel Size (μm)	PSF (μm)	Diffusion coefficient (μm2/sec)
SHRSHRGFP_710_Vasc_1	Zeiss 710	Vasculature & endodermis	128x128	0.1	0.241	1.57
SHRSHRGFP_710_Vasc_2	Zeiss 710	Vasculature	128x128	0.1	0.241	2.09
SHRSHRGFP_710_Vasc_3	Zeiss 710	Vasculature	128x128	0.1	0.336	5.13
SHRSHRGFP_710_Vasc_4	Zeiss 710	Vasculature & endodermis	128x128	0.1	0.336	3.2
SHRSHRGFP_710_Vasc_5	Zeiss 710	Vasculature & CEI	128x128	0.1	0.336	1.51
SHRSHRGFP_710_Vasc_6	Zeiss 710	Vasculature & endodermis	128x128	0.1	0.336	1.95
SHRSHRGFP_710_Vasc_7	Zeiss 710	Vasculature & endodermis	128x128	0.1	0.336	2.54
SHRSHRGFP_710_Vasc_8	Zeiss 710	Vasculature & endodermis	128x128	0.1	0.336	3.39
SHRSHRGFP_710_Vasc_9	Zeiss 710	Vasculature & endodermis	128x128	0.1	0.241	1
SHRSHRGFP_710_Vasc_10	Zeiss 710	Vasculature & endodermis	N/A	0.1	0.241	1.81
					Average:	2.419
					SD:	1.20999
					SE:	0.120999
					Grand Mean:	2.44675
					Grand SD:	1.64518
					Grand SE:	0.260126
Filename	Instrument	Location	ROI size (pixels)	Pixel Size (μm)	PSF (μm)	Diffusion coefficient (μm2/sec)
SHRSHRGFP_780_Endo_1	Zeiss 780	Endodermis	N/A	0.05	0.24	1.59
SHRSHRGFP_780_Endo_2	Zeiss 780	Endodermis	128x128	0.1	0.24	1.99
SHRSHRGFP_780_Endo_3	Zeiss 780	Endodermis	N/A	0.1	0.24	0.59
SHRSHRGFP_780_Endo_4	Zeiss 780	Endodermis	N/A	0.1	0.24	2.18
SHRSHRGFP_780_Endo_5	Zeiss 780	Endodermis	N/A	0.1	0.24	0.39
SHRSHRGFP_780_Endo_6	Zeiss 780	Endodermis	N/A	0.1	0.24	0.14
SHRSHRGFP_780_Endo_7	Zeiss 780	Endodermis	N/A	0.1	0.24	0.83
SHRSHRGFP_780_Endo_8	Zeiss 780	Endodermis	N/A	0.1	0.24	1.92
SHRSHRGFP_780_Endo_9	Zeiss 780	Endodermis	N/A	0.05	0.24	0.89
SHRSHRGFP_780_Endo_10	Zeiss 780	Endodermis	N/A	0.05	0.24	1.03
SHRSHRGFP_780_Endo_11	Zeiss 780	Endodermis	N/A	0.05	0.24	1.11
					Average:	1.15091
					SD:	0.68193
					SE:	0.20561
Filename	Instrument	Location	ROI size (pixels)	Pixel Size (μm)	PSF (μm)	Diffusion coefficient (μm2/sec)
SHRSHRGFP_710_Endo_1	Zeiss 710	Endodermis	N/A	0.1	0.241	1.11
SHRSHRGFP_710_Endo_2	Zeiss 710	Endodermis	N/A	0.1	0.336	1.62
SHRSHRGFP_710_Endo_3	Zeiss 710	Endodermis	N/A	0.1	0.336	1.78
SHRSHRGFP_710_Endo_4	Zeiss 710	Endodermis	N/A	0.1	0.241	1.52
SHRSHRGFP_710_Endo_5	Zeiss 710	Endodermis	N/A	0.06	0.241	1.33
SHRSHRGFP_710_Endo_6	Zeiss 710	Endodermis	N/A	0.06	0.241	1.7
SHRSHRGFP_710_Endo_7	Zeiss 710	Endodermis	N/A	0.08	0.241	2.01
SHRSHRGFP_710_Endo_8	Zeiss 710	Endodermis	N/A	0.1	0.241	0.77
					Average:	1.48
					SD:	0.397133
					SE:	0.140408
					Grand Mean:	1.28947
					Grand SD:	0.589533
					Grand SE:	0.135248
Filename	Instrument	Location	ROI size (pixels)	Pixel Size (μm)	PSF (μm)	Diffusion coefficient (μm2/sec)
SHRSHRGFP_780_Vasc_14	Zeiss 780	Vasculature & QC	128x128	0.1	0.24	1.89
SHRSHRGFP_780_Vasc_18	Zeiss 780	Vasculature & QC	128x128	0.1	0.24	1.02
SHRSHRGFP_780_Vasc_21	Zeiss 780	Vasculature & QC	128x128	0.1	0.24	1.67
SHRSHRGFP_780_Vasc_23	Zeiss 780	Vasculature & QC	128x128	0.1	0.24	1.23
SHRSHRGFP_780_QC_1	Zeiss 780	Vasculature & QC	N/A	0.05	0.24	1.54
					Average:	1.47
					SD:	0.346915
					SE:	0.155145
Filename	Instrument	Location	ROI size (pixels)	Pixel Size (μm)	PSF (μm)	Diffusion coefficient (μm2/sec)
SHRSHRGFP_710_QC_1	Zeiss 710	Vasculature & QC	128x128	0.1	0.241	2.79
SHRSHRGFP_710_QC_2	Zeiss 710	Vasculature & QC	128x128	0.1	0.336	1.88
SHRSHRGFP_710_QC_3	Zeiss 710	Vasculature & QC	128x128	0.1	0.336	2.38
SHRSHRGFP_710_QC_4	Zeiss 710	Vasculature & QC	128x128	0.1	0.336	0.8
SHRSHRGFP_710_QC_5	Zeiss 710	Vasculature & QC	N/A	0.1	0.241	0.61
SHRSHRGFP_710_QC_6	Zeiss 710	Vasculature & QC	N/A	0.07	0.241	1.27
SHRSHRGFP_710_QC_7	Zeiss 710	Vasculature & QC	128x128	0.1	0.241	2.56
SHRSHRGFP_710_QC_8	Zeiss 710	Vasculature & QC	128x128	0.1	0.241	1.69
SHRSHRGFP_710_QC_9	Zeiss 710	Vasculature & QC	128x128	0.1	0.241	2.24
SHRSHRGFP_710_QC_10	Zeiss 710	Vasculature & QC	128x128	0.1	0.241	1.04
SHRSHRGFP_710_QC_11	Zeiss 710	Vasculature & QC	128x128	0.1	0.241	1.65
SHRSHRGFP_710_QC_12	Zeiss 710	Vasculature & QC	128x128	0.1	0.241	1.24
SHRSHRGFP_710_QC_13	Zeiss 710	Vasculature & QC	128x128	0.1	0.241	1.98
SHRSHRGFP_710_QC_14	Zeiss 710	Vasculature & QC	N/A	0.06	0.241	1.84
SHRSHRGFP_710_QC_15	Zeiss 710	Vasculature & QC	128x128	0.1	0.336	3.33
					Average:	1.82
					SD:	0.759972
					SE:	0.219385
					Grand Mean:	1.7325
					Grand SD:	0.689263
					Grand SE:	0.154124
