# Supplementary material for: Tracking transcription factor mobility and interaction in Arabidopsis roots with fluorescence correlation spectroscopy
Source: eLife journal article supplement (doi:10.7554/elife.14770), 2016-06-11
Supplement: supp [file elife-14770-supp-v1.zip › elife_poa_e14770_Figure_1_source_data_3.xlsx]

## Sheet: Fig 1 SD 3- SHR in SCRi RICS
Filename	Instrument	Location	ROI size (pixels)	Pixel Size (μm)	PSF (μm)	Diffusion coefficient (μm2/sec)
SHRSHRGFPinSCRi_1	Zeiss 780	Endodermis	128x128	0.1	0.24	1.74
SHRSHRGFPinSCRi_2	Zeiss 780	Endodermis	N/A	0.05	0.24	2.72
SHRSHRGFPinSCRi_3	Zeiss 780	Vasculature	N/A	0.05	0.24	1.68
SHRSHRGFPinSCRi_4	Zeiss 780	Vasculature	N/A	0.05	0.24	4.21
SHRSHRGFPinSCRi_5	Zeiss 780	Endodermis	128x128	0.05	0.24	3.4
SHRSHRGFPinSCRi_6	Zeiss 780	Vasculature & endodermis	N/A	0.1	0.24	4.21
SHRSHRGFPinSCRi_7	Zeiss 780	Vasculature & endodermis	128x128	0.1	0.24	1.51
SHRSHRGFPinSCRi_8	Zeiss 780	Vasculature	128x128	0.1	0.24	1.29
SHRSHRGFPinSCRi_9	Zeiss 780	Endodermis	128x128	0.1	0.24	1.63
SHRSHRGFPinSCRi_10	Zeiss 780	Vasculature & endodermis	N/A	0.1	0.24	1
SHRSHRGFPinSCRi_11	Zeiss 780	Endodermis	128x128	0.1	0.24	3.63
SHRSHRGFPinSCRi_12	Zeiss 780	Vasculature & endodermis	128x128	0.1	0.24	2.05
SHRSHRGFPinSCRi_13	Zeiss 780	Vasculature & endodermis	128x128	0.1	0.24	2.35
SHRSHRGFPinSCRi_14	Zeiss 780	Endodermis	128x128	0.1	0.24	2.19
					Average:	2.40071
					SD:	1.06942
					SE:	0.285816
