# Supplementary material for: Tracking transcription factor mobility and interaction in Arabidopsis roots with fluorescence correlation spectroscopy
Source: eLife journal article supplement (doi:10.7554/elife.14770), 2016-06-11
Supplement: supp [file elife-14770-supp-v1.zip › elife_poa_e14770_Figure_1_source_data_4.xlsx]

## Sheet: Fig 1 SD 4 - RICS Statistics
Sample	Mean	SD	SE	Sample Size
35S:GFP	6.33256	2.13383	0.365949	34
SHR:SHR-GFP Vasc to Endo	2.44675	1.64518	0.260126	40
SHR:SHR-GFP Endo	1.28947	0.589533	0.135248	19
SHR:SHR-GFP Vasc to QC	1.7325	0.689263	0.154124	20
SHR:SHR-GFP in SCRi	2.40071	1.06942	0.285816	14
Comparison	p-value
Vasc to Endo vs Endo only	0.0303
SCRi vs Endo only	0.0223
Vasc to QC vs Endo	0.3995
Vasc to Endo vs SCRi	0.9337
Vasc to QC vs SCRi	0.4356
Vasc to QC vs Vasc to Endo	0.7047
Vasc to QC vs 35S	<0.0001
Endo vs 35S	<0.0001
Vasc to Endo vs 35S	<0.0001
SCRi vs 35S	<0.0001
