# Supplementary material for: Tracking transcription factor mobility and interaction in Arabidopsis roots with fluorescence correlation spectroscopy
Source: eLife journal article supplement (doi:10.7554/elife.14770), 2016-06-11
Supplement: supp [file elife-14770-supp-v1.zip › elife_poa_e14770_Figure_2_source_data_1.xlsx]

## Sheet: Fig 2 SD 1- pCF
Filename	Genotype	Line direction	Line distance	Movement	Average of Technical Replicates
35SGFP_pCF_1	35S:GFP	left to right	5	1
		left to right	7	1
		left to right	9	0	0.666667
35SGFP_pCF_2	35S:GFP	left to right	5	0
		left to right	7	1
		left to right	9	1	0.666667
35SGFP_pCF_3	35S:GFP	left to right	5	1
		left to right	7	1
		left to right	9	1	1
35SGFP_pCF_4	35S:GFP	left to right	5	1
		left to right	7	1
		left to right	9	0	0.666667
35SGFP_pCF_5	35S:GFP	left to right	5	1
		left to right	7	1
		left to right	9	1	1
35SGFP_pCF_6	35S:GFP	left to right	5	0
		left to right	7	1
		left to right	9	0	0.333333
35SGFP_pCF_7	35S:GFP	left to right	5	1
		left to right	7	1
		left to right	9	1	1
35SGFP_pCF_8	35S:GFP	left to right	5	0
		left to right	7	0
		left to right	9	1	0.333333
35SGFP_pCF_9	35S:GFP	left to right	5	0
		left to right	7	1
		left to right	9	1	0.666667
35SGFP_pCF_10	35S:GFP	left to right	5	1
		left to right	7	0
		left to right	9	0	0.333333
35SGFP_pCF_11	35S:GFP	left to right	5	0
		left to right	7	1
		left to right	9	0	0.333333
35SGFP_pCF_12	35S:GFP	left to right	5	1
		left to right	7	1
		left to right	9	1	1
35SGFP_pCF_13	35S:GFP	left to right	5	1
		left to right	7	1
		left to right	9	1	1
35SGFP_pCF_14	35S:GFP	left to right	5	0
		left to right	7	1
		left to right	9	1	0.666667
35SGFP_pCF_15	35S:GFP	left to right	5	1
		left to right	7	1
		left to right	9	1	1
			MI:	0.711111	0.711111
Filename	Genotype	Line direction	Line distance	Movement	Average of Technical Replicates
35SGFP_pCF_1	35S:GFP	right to left	5	1
		right to left	7	1
		right to left	9	0	0.666667
35SGFP_pCF_2	35S:GFP	right to left	5	0
		right to left	7	1
		right to left	9	1	0.666667
35SGFP_pCF_3	35S:GFP	right to left	5	1
		right to left	7	1
		right to left	9	1	1
35SGFP_pCF_4	35S:GFP	right to left	5	1
		right to left	7	1
		right to left	9	0	0.666667
35SGFP_pCF_5	35S:GFP	right to left	5	0
		right to left	7	1
		right to left	9	1	0.666667
35SGFP_pCF_6	35S:GFP	right to left	5	0
		right to left	7	1
		right to left	9	1	0.666667
35SGFP_pCF_7	35S:GFP	right to left	5	1
		right to left	7	0
		right to left	9	1	0.666667
35SGFP_pCF_8	35S:GFP	right to left	5	0
		right to left	7	1
		right to left	9	1	0.666667
35SGFP_pCF_9	35S:GFP	right to left	5	1
		right to left	7	0
		right to left	9	0	0.333333
35SGFP_pCF_10	35S:GFP	right to left	5	1
		right to left	7	1
		right to left	9	1	1
35SGFP_pCF_11	35S:GFP	right to left	5	1
		right to left	7	1
		right to left	9	1	1
35SGFP_pCF_12	35S:GFP	right to left	5	1
		right to left	7	1
		right to left	9	0	0.666667
35SGFP_pCF_13	35S:GFP	right to left	5	1
		right to left	7	1
		right to left	9	0	0.666667
35SGFP_pCF_14	35S:GFP	right to left	5	0
		right to left	7	0
		right to left	9	1	0.333333
35SGFP_pCF_15	35S:GFP	right to left	5	0
		right to left	7	1
		right to left	9	1	0.666667
			MI:	0.688889	0.688889
Filename	Genotype	Line direction	Line distance	Movement	Average of Technical Replicates
TMO5_3xGFP_pCF_1	TMO5:3xGFP	left to right	5	0
		left to right	7	1
		left to right	9	0	0.333333
TMO5_3xGFP_pCF_2	TMO5:3xGFP	left to right	5	0
		left to right	7	0
		left to right	9	0	0
TMO5_3xGFP_pCF_3	TMO5:3xGFP	left to right	5	0
		left to right	7	1
		left to right	9	0	0.333333
TMO5_3xGFP_pCF_4	TMO5:3xGFP	left to right	5	0
		left to right	7	0
		left to right	9	1	0.333333
TMO5_3xGFP_pCF_5	TMO5:3xGFP	left to right	5	0
		left to right	7	0
		left to right	9	0	0
TMO5_3xGFP_pCF_6	TMO5:3xGFP	left to right	5	1
		left to right	7	0
		left to right	9	0	0.333333
TMO5_3xGFP_pCF_7	TMO5:3xGFP	left to right	5	0
		left to right	7	0
		left to right	9	1	0.333333
TMO5_3xGFP_pCF_8	TMO5:3xGFP	left to right	5	0
		left to right	7	0
		left to right	9	0	0
TMO5_3xGFP_pCF_9	TMO5:3xGFP	left to right	5	0
		left to right	7	0
		left to right	9	0	0
TMO5_3xGFP_pCF_10	TMO5:3xGFP	left to right	5	0
		left to right	7	1
		left to right	9	0	0.333333
TMO5_3xGFP_pCF_11	TMO5:3xGFP	left to right	5	0
		left to right	7	0
		left to right	9	0	0
TMO5_3xGFP_pCF_12	TMO5:3xGFP	left to right	5	0
		left to right	7	1
		left to right	9	0	0.333333
TMO5_3xGFP_pCF_13	TMO5:3xGFP	left to right	5	1
		left to right	7	0
		left to right	9	0	0.333333
TMO5_3xGFP_pCF_14	TMO5:3xGFP	left to right	5	0
		left to right	7	0
		left to right	9	1	0.333333
TMO5_3xGFP_pCF_15	TMO5:3xGFP	left to right	5	1
		left to right	7	0
		left to right	9	1	0.666667
TMO5_3xGFP_pCF_16	TMO5:3xGFP	left to right	5	0
		left to right	7	0
		left to right	9	1	0.333333
TMO5_3xGFP_pCF_17	TMO5:3xGFP	left to right	5	0
		left to right	7	0
		left to right	9	0	0
TMO5_3xGFP_pCF_18	TMO5:3xGFP	left to right	5	1
		left to right	7	0
		left to right	9	0	0.333333
TMO5_3xGFP_pCF_19	TMO5:3xGFP	left to right	5	1
		left to right	7	1
		left to right	9	0	0.666667
			MI:	0.263158	0.263158
Filename	Genotype	Line direction	Line distance	Movement	Average of Technical Replicates
TMO5_3xGFP_pCF_1	TMO5:3xGFP	right to left	5	1
		right to left	7	0
		right to left	9	0	0.333333
TMO5_3xGFP_pCF_2	TMO5:3xGFP	right to left	5	0
		right to left	7	0
		right to left	9	1	0.333333
TMO5_3xGFP_pCF_3	TMO5:3xGFP	right to left	5	1
		right to left	7	0
		right to left	9	1	0.666667
TMO5_3xGFP_pCF_4	TMO5:3xGFP	right to left	5	0
		right to left	7	0
		right to left	9	0	0
TMO5_3xGFP_pCF_5	TMO5:3xGFP	right to left	5	0
		right to left	7	0
		right to left	9	0	0
TMO5_3xGFP_pCF_6	TMO5:3xGFP	right to left	5	0
		right to left	7	0
		right to left	9	1	0.333333
TMO5_3xGFP_pCF_7	TMO5:3xGFP	right to left	5	0
		right to left	7	0
		right to left	9	0	0
TMO5_3xGFP_pCF_8	TMO5:3xGFP	right to left	5	0
		right to left	7	0
		right to left	9	0	0
TMO5_3xGFP_pCF_9	TMO5:3xGFP	right to left	5	1
		right to left	7	1
		right to left	9	0	0.666667
TMO5_3xGFP_pCF_10	TMO5:3xGFP	right to left	5	0
		right to left	7	0
		right to left	9	0	0
TMO5_3xGFP_pCF_11	TMO5:3xGFP	right to left	5	0
		right to left	7	0
		right to left	9	1	0.333333
TMO5_3xGFP_pCF_12	TMO5:3xGFP	right to left	5	0
		right to left	7	0
		right to left	9	0	0
TMO5_3xGFP_pCF_13	TMO5:3xGFP	right to left	5	0
		right to left	7	0
		right to left	9	0	0
TMO5_3xGFP_pCF_14	TMO5:3xGFP	right to left	5	0
		right to left	7	1
		right to left	9	0	0.333333
TMO5_3xGFP_pCF_15	TMO5:3xGFP	right to left	5	0
		right to left	7	1
		right to left	9	0	0.333333
TMO5_3xGFP_pCF_16	TMO5:3xGFP	right to left	5	0
		right to left	7	0
		right to left	9	0	0
TMO5_3xGFP_pCF_17	TMO5:3xGFP	right to left	5	0
		right to left	7	1
		right to left	9	0	0.333333
TMO5_3xGFP_pCF_18	TMO5:3xGFP	right to left	5	1
		right to left	7	0
		right to left	9	0	0.333333
TMO5_3xGFP_pCF_19	TMO5:3xGFP	right to left	5	0
		right to left	7	0
		right to left	9	1	0.333333
			MI:	0.22807	0.22807
Filename	Genotype	Line direction	Line distance	Movement	Average of Technical Replicates
SCRSCRGFP_pCF_1	SCR:SCR-GFP	endo to cortex	5	1
		endo to cortex	7	0
		endo to cortex	9	1	0.666667
SCRSCRGFP_pCF_2	SCR:SCR-GFP	endo to cortex	5	1
		endo to cortex	7	0
		endo to cortex	9	1	0.666667
SCRSCRGFP_pCF_3	SCR:SCR-GFP	endo to cortex	5	0
		endo to cortex	7	0
		endo to cortex	9	0	0
SCRSCRGFP_pCF_4	SCR:SCR-GFP	endo to cortex	5	0
		endo to cortex	7	0
		endo to cortex	9	0	0
SCRSCRGFP_pCF_5	SCR:SCR-GFP	endo to cortex	5	0
		endo to cortex	7	0
		endo to cortex	9	0	0
SCRSCRGFP_pCF_6	SCR:SCR-GFP	endo to cortex	5	1
		endo to cortex	7	0
		endo to cortex	9	1	0.666667
SCRSCRGFP_pCF_7	SCR:SCR-GFP	endo to cortex	5	0
		endo to cortex	7	0
		endo to cortex	9	0	0
SCRSCRGFP_pCF_8	SCR:SCR-GFP	endo to cortex	5	1
		endo to cortex	7	0
		endo to cortex	9	1	0.666667
SCRSCRGFP_pCF_9	SCR:SCR-GFP	endo to cortex	5	0
		endo to cortex	7	0
		endo to cortex	9	0	0
SCRSCRGFP_pCF_10	SCR:SCR-GFP	endo to cortex	5	1
		endo to cortex	7	1
		endo to cortex	9	0	0.666667
SCRSCRGFP_pCF_11	SCR:SCR-GFP	endo to cortex	5	0
		endo to cortex	7	1
		endo to cortex	9	0	0.333333
SCRSCRGFP_pCF_12	SCR:SCR-GFP	endo to cortex	5	0
		endo to cortex	7	1
		endo to cortex	9	0	0.333333
SCRSCRGFP_pCF_13	SCR:SCR-GFP	endo to cortex	5	0
		endo to cortex	7	1
		endo to cortex	9	0	0.333333
SCRSCRGFP_pCF_14	SCR:SCR-GFP	endo to cortex	5	0
		endo to cortex	7	0
		endo to cortex	9	0	0
			MI:	0.309524	0.309524
Filename	Genotype	Line direction	Line distance	Movement	Average of Technical Replicates
SCRSCRGFP_pCF_1	SCR:SCR-GFP	cortex to endo	5	0
		cortex to endo	7	1
		cortex to endo	9	0	0.333333
SCRSCRGFP_pCF_2	SCR:SCR-GFP	cortex to endo	5	1
		cortex to endo	7	0
		cortex to endo	9	1	0.666667
SCRSCRGFP_pCF_3	SCR:SCR-GFP	cortex to endo	5	0
		cortex to endo	7	0
		cortex to endo	9	1	0.333333
SCRSCRGFP_pCF_4	SCR:SCR-GFP	cortex to endo	5	0
		cortex to endo	7	0
		cortex to endo	9	0	0
SCRSCRGFP_pCF_5	SCR:SCR-GFP	cortex to endo	5	0
		cortex to endo	7	0
		cortex to endo	9	0	0
SCRSCRGFP_pCF_6	SCR:SCR-GFP	cortex to endo	5	0
		cortex to endo	7	0
		cortex to endo	9	0	0
SCRSCRGFP_pCF_7	SCR:SCR-GFP	cortex to endo	5	0
		cortex to endo	7	0
		cortex to endo	9	0	0
SCRSCRGFP_pCF_8	SCR:SCR-GFP	cortex to endo	5	0
		cortex to endo	7	0
		cortex to endo	9	1	0.333333
SCRSCRGFP_pCF_9	SCR:SCR-GFP	cortex to endo	5	1
		cortex to endo	7	0
		cortex to endo	9	0	0.333333
SCRSCRGFP_pCF_10	SCR:SCR-GFP	cortex to endo	5	0
		cortex to endo	7	1
		cortex to endo	9	1	0.666667
SCRSCRGFP_pCF_11	SCR:SCR-GFP	cortex to endo	5	0
		cortex to endo	7	1
		cortex to endo	9	1	0.666667
SCRSCRGFP_pCF_12	SCR:SCR-GFP	cortex to endo	5	0
		cortex to endo	7	1
		cortex to endo	9	0	0.333333
SCRSCRGFP_pCF_13	SCR:SCR-GFP	cortex to endo	5	1
		cortex to endo	7	0
		cortex to endo	9	0	0.333333
SCRSCRGFP_pCF_14	SCR:SCR-GFP	cortex to endo	5	1
		cortex to endo	7	0
		cortex to endo	9	0	0.333333
			MI:	0.309524	0.309524
Filename	Genotype	Line direction	Line distance	Movement	Average of Technical Replicates
SHRSHRGFP_pCF_1	SHR:SHR-GFP in shr2	vasc to endo	5	1
		vasc to endo	7	1
		vasc to endo	9	0	0.666667
SHRSHRGFP_pCF_2	SHR:SHR-GFP in shr2	vasc to endo	5	1
		vasc to endo	7	1
		vasc to endo	9	0	0.666667
SHRSHRGFP_pCF_3	SHR:SHR-GFP in shr2	vasc to endo	5	0
		vasc to endo	7	1
		vasc to endo	9	0	0.333333
SHRSHRGFP_pCF_4	SHR:SHR-GFP in shr2	vasc to endo	5	1
		vasc to endo	7	0
		vasc to endo	9	1	0.666667
SHRSHRGFP_pCF_5	SHR:SHR-GFP in shr2	vasc to endo	5	1
		vasc to endo	7	1
		vasc to endo	9	0	0.666667
SHRSHRGFP_pCF_6	SHR:SHR-GFP in shr2	vasc to endo	5	0
		vasc to endo	7	0
		vasc to endo	9	1	0.333333
SHRSHRGFP_pCF_7	SHR:SHR-GFP in shr2	vasc to endo	5	0
		vasc to endo	7	1
		vasc to endo	9	1	0.666667
SHRSHRGFP_pCF_8	SHR:SHR-GFP in shr2	vasc to endo	5	1
		vasc to endo	7	1
		vasc to endo	9	0	0.666667
SHRSHRGFP_pCF_9	SHR:SHR-GFP in shr2	vasc to endo	5	1
		vasc to endo	7	1
		vasc to endo	9	0	0.666667
SHRSHRGFP_pCF_10	SHR:SHR-GFP in shr2	vasc to endo	5	0
		vasc to endo	7	1
		vasc to endo	9	1	0.666667
SHRSHRGFP_pCF_11	SHR:SHR-GFP in shr2	vasc to endo	5	0
		vasc to endo	7	1
		vasc to endo	9	0	0.333333
SHRSHRGFP_pCF_12	SHR:SHR-GFP in shr2	vasc to endo	5	1
		vasc to endo	7	1
		vasc to endo	9	0	0.666667
SHRSHRGFP_pCF_13	SHR:SHR-GFP in shr2	vasc to endo	5	1
		vasc to endo	7	1
		vasc to endo	9	0	0.666667
SHRSHRGFP_pCF_14	SHR:SHR-GFP in shr2	vasc to endo	5	0
		vasc to endo	7	1
		vasc to endo	9	1	0.666667
SHRSHRGFP_pCF_15	SHR:SHR-GFP in shr2	vasc to endo	5	0
		vasc to endo	7	1
		vasc to endo	9	0	0.333333
SHRSHRGFP_pCF_16	SHR:SHR-GFP in shr2	vasc to endo	5	1
		vasc to endo	7	0
		vasc to endo	9	1	0.666667
SHRSHRGFP_pCF_17	SHR:SHR-GFP in shr2	vasc to endo	5	0
		vasc to endo	7	1
		vasc to endo	9	1	0.666667
SHRSHRGFP_pCF_18	SHR:SHR-GFP in shr2	vasc to endo	5	1
		vasc to endo	7	1
		vasc to endo	9	0	0.666667
SHRSHRGFP_pCF_19	SHR:SHR-GFP in shr2	vasc to endo	5	1
		vasc to endo	7	1
		vasc to endo	9	0	0.666667
SHRSHRGFP_pCF_20	SHR:SHR-GFP in shr2	vasc to endo	5	1
		vasc to endo	7	0
		vasc to endo	9	0	0.333333
			MI:	0.583333	0.583333
Filename	Genotype	Line direction	Line distance	Movement	Average of Technical Replicates
SHRSHRGFP_pCF_1	SHR:SHR-GFP in shr2	endo to vasc	5	0
		endo to vasc	7	1
		endo to vasc	9	0	0.333333
SHRSHRGFP_pCF_2	SHR:SHR-GFP in shr2	endo to vasc	5	0
		endo to vasc	7	0
		endo to vasc	9	0	0
SHRSHRGFP_pCF_3	SHR:SHR-GFP in shr2	endo to vasc	5	1
		endo to vasc	7	0
		endo to vasc	9	1	0.666667
SHRSHRGFP_pCF_4	SHR:SHR-GFP in shr2	endo to vasc	5	0
		endo to vasc	7	0
		endo to vasc	9	0	0
SHRSHRGFP_pCF_5	SHR:SHR-GFP in shr2	endo to vasc	5	1
		endo to vasc	7	0
		endo to vasc	9	1	0.666667
SHRSHRGFP_pCF_6	SHR:SHR-GFP in shr2	endo to vasc	5	0
		endo to vasc	7	0
		endo to vasc	9	0	0
SHRSHRGFP_pCF_7	SHR:SHR-GFP in shr2	endo to vasc	5	0
		endo to vasc	7	0
		endo to vasc	9	0	0
SHRSHRGFP_pCF_8	SHR:SHR-GFP in shr2	endo to vasc	5	1
		endo to vasc	7	0
		endo to vasc	9	0	0.333333
SHRSHRGFP_pCF_9	SHR:SHR-GFP in shr2	endo to vasc	5	1
		endo to vasc	7	0
		endo to vasc	9	0	0.333333
SHRSHRGFP_pCF_10	SHR:SHR-GFP in shr2	endo to vasc	5	0
		endo to vasc	7	0
		endo to vasc	9	0	0
SHRSHRGFP_pCF_11	SHR:SHR-GFP in shr2	endo to vasc	5	0
		endo to vasc	7	0
		endo to vasc	9	0	0
SHRSHRGFP_pCF_12	SHR:SHR-GFP in shr2	endo to vasc	5	0
		endo to vasc	7	0
		endo to vasc	9	0	0
SHRSHRGFP_pCF_13	SHR:SHR-GFP in shr2	endo to vasc	5	1
		endo to vasc	7	1
		endo to vasc	9	0	0.666667
SHRSHRGFP_pCF_14	SHR:SHR-GFP in shr2	endo to vasc	5	1
		endo to vasc	7	0
		endo to vasc	9	1	0.666667
SHRSHRGFP_pCF_15	SHR:SHR-GFP in shr2	endo to vasc	5	1
		endo to vasc	7	1
		endo to vasc	9	0	0.666667
SHRSHRGFP_pCF_16	SHR:SHR-GFP in shr2	endo to vasc	5	1
		endo to vasc	7	1
		endo to vasc	9	0	0.666667
SHRSHRGFP_pCF_17	SHR:SHR-GFP in shr2	endo to vasc	5	1
		endo to vasc	7	1
		endo to vasc	9	1	1
SHRSHRGFP_pCF_18	SHR:SHR-GFP in shr2	endo to vasc	5	1
		endo to vasc	7	0
		endo to vasc	9	0	0.333333
SHRSHRGFP_pCF_19	SHR:SHR-GFP in shr2	endo to vasc	5	1
		endo to vasc	7	0
		endo to vasc	9	1	0.666667
SHRSHRGFP_pCF_20	SHR:SHR-GFP in shr2	endo to vasc	5	0
		endo to vasc	7	0
		endo to vasc	9	1	0.333333
			MI:	0.366667	0.366667
Filename	Genotype	Line direction	Line distance	Movement	Average of Technical Replicates
SHRSHRGFP_pCF_EC_1	SHR:SHR-GFP in shr2	endo to cortex	5	1
		endo to cortex	7	1
		endo to cortex	9	0	0.666667
SHRSHRGFP_pCF_EC_2	SHR:SHR-GFP in shr2	endo to cortex	5	0
		endo to cortex	7	0
		endo to cortex	9	0	0
SHRSHRGFP_pCF_EC_3	SHR:SHR-GFP in shr2	endo to cortex	5	0
		endo to cortex	7	0
		endo to cortex	9	1	0.333333
SHRSHRGFP_pCF_EC_4	SHR:SHR-GFP in shr2	endo to cortex	5	0
		endo to cortex	7	1
		endo to cortex	9	1	0.666667
SHRSHRGFP_pCF_EC_5	SHR:SHR-GFP in shr2	endo to cortex	5	1
		endo to cortex	7	1
		endo to cortex	9	0	0.666667
SHRSHRGFP_pCF_EC_6	SHR:SHR-GFP in shr2	endo to cortex	5	1
		endo to cortex	7	1
		endo to cortex	9	1	1
SHRSHRGFP_pCF_EC_7	SHR:SHR-GFP in shr2	endo to cortex	5	1
		endo to cortex	7	0
		endo to cortex	9	0	0.333333
SHRSHRGFP_pCF_EC_8	SHR:SHR-GFP in shr2	endo to cortex	5	0
		endo to cortex	7	1
		endo to cortex	9	0	0.333333
SHRSHRGFP_pCF_EC_9	SHR:SHR-GFP in shr2	endo to cortex	5	1
		endo to cortex	7	1
		endo to cortex	9	1	1
SHRSHRGFP_pCF_EC_10	SHR:SHR-GFP in shr2	endo to cortex	5	1
		endo to cortex	7	1
		endo to cortex	9	0	0.666667
SHRSHRGFP_pCF_EC_11	SHR:SHR-GFP in shr2	endo to cortex	5	1
		endo to cortex	7	1
		endo to cortex	9	1	1
SHRSHRGFP_pCF_EC_12	SHR:SHR-GFP in shr2	endo to cortex	5	1
		endo to cortex	7	1
		endo to cortex	9	1	1
SHRSHRGFP_pCF_EC_13	SHR:SHR-GFP in shr2	endo to cortex	5	1
		endo to cortex	7	1
		endo to cortex	9	1	1
SHRSHRGFP_pCF_EC_14	SHR:SHR-GFP in shr2	endo to cortex	5	0
		endo to cortex	7	1
		endo to cortex	9	0	0.333333
SHRSHRGFP_pCF_EC_15	SHR:SHR-GFP in shr2	endo to cortex	5	0
		endo to cortex	7	1
		endo to cortex	9	1	0.666667
SHRSHRGFP_pCF_EC_16	SHR:SHR-GFP in shr2	endo to cortex	5	1
		endo to cortex	7	0
		endo to cortex	9	1	0.666667
SHRSHRGFP_pCF_EC_17	SHR:SHR-GFP in shr2	endo to cortex	5	0
		endo to cortex	7	1
		endo to cortex	9	0	0.333333
SHRSHRGFP_pCF_EC_18	SHR:SHR-GFP in shr2	endo to cortex	5	1
		endo to cortex	7	1
		endo to cortex	9	0	0.666667
SHRSHRGFP_pCF_EC_19	SHR:SHR-GFP in shr2	endo to cortex	5	1
		endo to cortex	7	1
		endo to cortex	9	1	1
SHRSHRGFP_pCF_EC_20	SHR:SHR-GFP in shr2	endo to cortex	5	0
		endo to cortex	7	1
		endo to cortex	9	0	0.333333
SHRSHRGFP_pCF_EC_21	SHR:SHR-GFP in shr2	endo to cortex	5	0
		endo to cortex	7	0
		endo to cortex	9	1	0.333333
SHRSHRGFP_pCF_EC_22	SHR:SHR-GFP in shr2	endo to cortex	5	0
		endo to cortex	7	1
		endo to cortex	9	0	0.333333
			MI:	0.606061	0.606061
Filename	Genotype	Line direction	Line distance	Movement	Average of Technical Replicates
SHRSHRGFP_pCF_EC_1	SHR:SHR-GFP in shr2	cortex to endo	5	1
		cortex to endo	7	0
		cortex to endo	9	1	0.666667
SHRSHRGFP_pCF_EC_2	SHR:SHR-GFP in shr2	cortex to endo	5	0
		cortex to endo	7	1
		cortex to endo	9	0	0.333333
SHRSHRGFP_pCF_EC_3	SHR:SHR-GFP in shr2	cortex to endo	5	0
		cortex to endo	7	0
		cortex to endo	9	1	0.333333
SHRSHRGFP_pCF_EC_4	SHR:SHR-GFP in shr2	cortex to endo	5	0
		cortex to endo	7	1
		cortex to endo	9	0	0.333333
SHRSHRGFP_pCF_EC_5	SHR:SHR-GFP in shr2	cortex to endo	5	1
		cortex to endo	7	1
		cortex to endo	9	0	0.666667
SHRSHRGFP_pCF_EC_6	SHR:SHR-GFP in shr2	cortex to endo	5	0
		cortex to endo	7	1
		cortex to endo	9	0	0.333333
SHRSHRGFP_pCF_EC_7	SHR:SHR-GFP in shr2	cortex to endo	5	1
		cortex to endo	7	1
		cortex to endo	9	1	1
SHRSHRGFP_pCF_EC_8	SHR:SHR-GFP in shr2	cortex to endo	5	1
		cortex to endo	7	0
		cortex to endo	9	1	0.666667
SHRSHRGFP_pCF_EC_9	SHR:SHR-GFP in shr2	cortex to endo	5	1
		cortex to endo	7	0
		cortex to endo	9	0	0.333333
SHRSHRGFP_pCF_EC_10	SHR:SHR-GFP in shr2	cortex to endo	5	1
		cortex to endo	7	0
		cortex to endo	9	1	0.666667
SHRSHRGFP_pCF_EC_11	SHR:SHR-GFP in shr2	cortex to endo	5	1
		cortex to endo	7	1
		cortex to endo	9	1	1
SHRSHRGFP_pCF_EC_12	SHR:SHR-GFP in shr2	cortex to endo	5	0
		cortex to endo	7	0
		cortex to endo	9	0	0
SHRSHRGFP_pCF_EC_13	SHR:SHR-GFP in shr2	cortex to endo	5	1
		cortex to endo	7	0
		cortex to endo	9	0	0.333333
SHRSHRGFP_pCF_EC_14	SHR:SHR-GFP in shr2	cortex to endo	5	0
		cortex to endo	7	1
		cortex to endo	9	0	0.333333
SHRSHRGFP_pCF_EC_15	SHR:SHR-GFP in shr2	cortex to endo	5	1
		cortex to endo	7	1
		cortex to endo	9	1	1
SHRSHRGFP_pCF_EC_16	SHR:SHR-GFP in shr2	cortex to endo	5	0
		cortex to endo	7	0
		cortex to endo	9	1	0.333333
SHRSHRGFP_pCF_EC_17	SHR:SHR-GFP in shr2	cortex to endo	5	1
		cortex to endo	7	0
		cortex to endo	9	0	0.333333
SHRSHRGFP_pCF_EC_18	SHR:SHR-GFP in shr2	cortex to endo	5	1
		cortex to endo	7	0
		cortex to endo	9	1	0.666667
SHRSHRGFP_pCF_EC_19	SHR:SHR-GFP in shr2	cortex to endo	5	1
		cortex to endo	7	1
		cortex to endo	9	0	0.666667
SHRSHRGFP_pCF_EC_20	SHR:SHR-GFP in shr2	cortex to endo	5	0
		cortex to endo	7	1
		cortex to endo	9	0	0.333333
SHRSHRGFP_pCF_EC_21	SHR:SHR-GFP in shr2	cortex to endo	5	1
		cortex to endo	7	0
		cortex to endo	9	1	0.666667
SHRSHRGFP_pCF_EC_22	SHR:SHR-GFP in shr2	cortex to endo	5	1
		cortex to endo	7	0
		cortex to endo	9	1	0.666667
			MI:	0.530303	0.530303
Filename	Genotype	Line direction	Line distance	Movement	Average of Technical Replicates
SHRSHRGFPinSCRi_pCF_1	SHR:SHR-GFP in SCRi	vasc to endo	5	1
		vasc to endo	7	1
		vasc to endo	9	1	1
SHRSHRGFPinSCRi_pCF_2	SHR:SHR-GFP in SCRi	vasc to endo	5	0
		vasc to endo	7	1
		vasc to endo	9	1	0.666667
SHRSHRGFPinSCRi_pCF_3	SHR:SHR-GFP in SCRi	vasc to endo	5	1
		vasc to endo	7	1
		vasc to endo	9	0	0.666667
SHRSHRGFPinSCRi_pCF_4	SHR:SHR-GFP in SCRi	vasc to endo	5	1
		vasc to endo	7	1
		vasc to endo	9	1	1
SHRSHRGFPinSCRi_pCF_5	SHR:SHR-GFP in SCRi	vasc to endo	5	1
		vasc to endo	7	1
		vasc to endo	9	0	0.666667
SHRSHRGFPinSCRi_pCF_6	SHR:SHR-GFP in SCRi	vasc to endo	5	1
		vasc to endo	7	0
		vasc to endo	9	0	0.333333
SHRSHRGFPinSCRi_pCF_7	SHR:SHR-GFP in SCRi	vasc to endo	5	1
		vasc to endo	7	0
		vasc to endo	9	0	0.333333
SHRSHRGFPinSCRi_pCF_8	SHR:SHR-GFP in SCRi	vasc to endo	5	1
		vasc to endo	7	1
		vasc to endo	9	0	0.666667
SHRSHRGFPinSCRi_pCF_9	SHR:SHR-GFP in SCRi	vasc to endo	5	1
		vasc to endo	7	0
		vasc to endo	9	1	0.666667
SHRSHRGFPinSCRi_pCF_10	SHR:SHR-GFP in SCRi	vasc to endo	5	0
		vasc to endo	7	1
		vasc to endo	9	1	0.666667
SHRSHRGFPinSCRi_pCF_11	SHR:SHR-GFP in SCRi	vasc to endo	5	0
		vasc to endo	7	1
		vasc to endo	9	0	0.333333
SHRSHRGFPinSCRi_pCF_12	SHR:SHR-GFP in SCRi	vasc to endo	5	0
		vasc to endo	7	1
		vasc to endo	9	0	0.333333
SHRSHRGFPinSCRi_pCF_13	SHR:SHR-GFP in SCRi	vasc to endo	5	1
		vasc to endo	7	1
		vasc to endo	9	1	1
SHRSHRGFPinSCRi_pCF_14	SHR:SHR-GFP in SCRi	vasc to endo	5	1
		vasc to endo	7	1
		vasc to endo	9	1	1
			MI:	0.666667	0.666667
Filename	Genotype	Line direction	Line distance	Movement	Average of Technical Replicates
SHRSHRGFPinSCRi_pCF_1	SHR:SHR-GFP in SCRi	endo to vasc	5	1
		endo to vasc	7	1
		endo to vasc	9	1	1
SHRSHRGFPinSCRi_pCF_2	SHR:SHR-GFP in SCRi	endo to vasc	5	1
		endo to vasc	7	1
		endo to vasc	9	1	1
SHRSHRGFPinSCRi_pCF_3	SHR:SHR-GFP in SCRi	endo to vasc	5	0
		endo to vasc	7	1
		endo to vasc	9	1	0.666667
SHRSHRGFPinSCRi_pCF_4	SHR:SHR-GFP in SCRi	endo to vasc	5	1
		endo to vasc	7	1
		endo to vasc	9	1	1
SHRSHRGFPinSCRi_pCF_5	SHR:SHR-GFP in SCRi	endo to vasc	5	1
		endo to vasc	7	1
		endo to vasc	9	1	1
SHRSHRGFPinSCRi_pCF_6	SHR:SHR-GFP in SCRi	endo to vasc	5	1
		endo to vasc	7	0
		endo to vasc	9	0	0.333333
SHRSHRGFPinSCRi_pCF_7	SHR:SHR-GFP in SCRi	endo to vasc	5	1
		endo to vasc	7	1
		endo to vasc	9	1	1
SHRSHRGFPinSCRi_pCF_8	SHR:SHR-GFP in SCRi	endo to vasc	5	1
		endo to vasc	7	1
		endo to vasc	9	1	1
SHRSHRGFPinSCRi_pCF_9	SHR:SHR-GFP in SCRi	endo to vasc	5	1
		endo to vasc	7	1
		endo to vasc	9	1	1
SHRSHRGFPinSCRi_pCF_10	SHR:SHR-GFP in SCRi	endo to vasc	5	1
		endo to vasc	7	1
		endo to vasc	9	1	1
SHRSHRGFPinSCRi_pCF_11	SHR:SHR-GFP in SCRi	endo to vasc	5	1
		endo to vasc	7	1
		endo to vasc	9	1	1
SHRSHRGFPinSCRi_pCF_12	SHR:SHR-GFP in SCRi	endo to vasc	5	1
		endo to vasc	7	0
		endo to vasc	9	0	0.333333
SHRSHRGFPinSCRi_pCF_13	SHR:SHR-GFP in SCRi	endo to vasc	5	0
		endo to vasc	7	0
		endo to vasc	9	0	0
SHRSHRGFPinSCRi_pCF_14	SHR:SHR-GFP in SCRi	endo to vasc	5	1
		endo to vasc	7	1
		endo to vasc	9	0	0.666667
			MI:	0.785714	0.785714
Filename	Genotype	Line direction	Line distance	Movement	Average of Technical Replicates
SHRSHRGFPinSCRi_pCF_3	SHR:SHR-GFP in SCRi	endo to extra to cortex	5	0
		endo to extra to cortex	7	1
		endo to extra to cortex	9	0	0.333333
SHRSHRGFPinSCRi_pCF_5	SHR:SHR-GFP in SCRi	endo to extra to cortex	5	1
		endo to extra to cortex	7	0
		endo to extra to cortex	9	0	0.333333
SHRSHRGFPinSCRi_pCF_13	SHR:SHR-GFP in SCRi	endo to extra to cortex	5	1
		endo to extra to cortex	7	0
		endo to extra to cortex	9	1	0.666667
SHRSHRGFPinSCRi_pCF_14	SHR:SHR-GFP in SCRi	endo to extra to cortex	5	1
		endo to extra to cortex	7	1
		endo to extra to cortex	9	1	1
SHRSHRGFPinSCRi_pCF_EC_1	SHR:SHR-GFP in SCRi	endo to extra to cortex	5	0
		endo to extra to cortex	7	1
		endo to extra to cortex	9	0	0.333333
SHRSHRGFPinSCRi_pCF_EC_2	SHR:SHR-GFP in SCRi	endo to extra to cortex	5	0
		endo to extra to cortex	7	1
		endo to extra to cortex	9	1	0.666667
SHRSHRGFPinSCRi_pCF_EC_3	SHR:SHR-GFP in SCRi	endo to extra to cortex	5	0
		endo to extra to cortex	7	1
		endo to extra to cortex	9	1	0.666667
SHRSHRGFPinSCRi_pCF_EC_4	SHR:SHR-GFP in SCRi	endo to extra to cortex	5	1
		endo to extra to cortex	7	0
		endo to extra to cortex	9	0	0.333333
SHRSHRGFPinSCRi_pCF_EC_5	SHR:SHR-GFP in SCRi	endo to extra to cortex	5	1
		endo to extra to cortex	7	1
		endo to extra to cortex	9	1	1
SHRSHRGFPinSCRi_pCF_EC_6	SHR:SHR-GFP in SCRi	endo to extra to cortex	5	1
		endo to extra to cortex	7	1
		endo to extra to cortex	9	0	0.666667
SHRSHRGFPinSCRi_pCF_EC_7	SHR:SHR-GFP in SCRi	endo to extra to cortex	5	1
		endo to extra to cortex	7	1
		endo to extra to cortex	9	0	0.666667
SHRSHRGFPinSCRi_pCF_EC_8	SHR:SHR-GFP in SCRi	endo to extra to cortex	5	1
		endo to extra to cortex	7	1
		endo to extra to cortex	9	0	0.666667
SHRSHRGFPinSCRi_pCF_EC_9	SHR:SHR-GFP in SCRi	endo to extra to cortex	5	1
		endo to extra to cortex	7	1
		endo to extra to cortex	9	0	0.666667
SHRSHRGFPinSCRi_pCF_EC_10	SHR:SHR-GFP in SCRi	endo to extra to cortex	5	0
		endo to extra to cortex	7	0
		endo to extra to cortex	9	1	0.333333
SHRSHRGFPinSCRi_pCF_EC_11	SHR:SHR-GFP in SCRi	endo to extra to cortex	5	1
		endo to extra to cortex	7	1
		endo to extra to cortex	9	0	0.666667
SHRSHRGFPinSCRi_pCF_EC_12	SHR:SHR-GFP in SCRi	endo to extra to cortex	5	0
		endo to extra to cortex	7	1
		endo to extra to cortex	9	1	0.666667
SHRSHRGFPinSCRi_pCF_EC_13	SHR:SHR-GFP in SCRi	endo to extra to cortex	5	0
		endo to extra to cortex	7	1
		endo to extra to cortex	9	1	0.666667
			MI:	0.607843	0.607843
Filename	Genotype	Line direction	Line distance	Movement	Average of Technical Replicates
SHRSHRGFPinSCRi_pCF_3	SHR:SHR-GFP in SCRi	cortex to extra to endo	5	0
		cortex to extra to endo	7	0
		cortex to extra to endo	9	1	0.333333
SHRSHRGFPinSCRi_pCF_5	SHR:SHR-GFP in SCRi	cortex to extra to endo	5	1
		cortex to extra to endo	7	1
		cortex to extra to endo	9	1	1
SHRSHRGFPinSCRi_pCF_13	SHR:SHR-GFP in SCRi	cortex to extra to endo	5	1
		cortex to extra to endo	7	1
		cortex to extra to endo	9	1	1
SHRSHRGFPinSCRi_pCF_14	SHR:SHR-GFP in SCRi	cortex to extra to endo	5	0
		cortex to extra to endo	7	1
		cortex to extra to endo	9	0	0.333333
SHRSHRGFPinSCRi_pCF_EC_1	SHR:SHR-GFP in SCRi	cortex to extra to endo	5	1
		cortex to extra to endo	7	0
		cortex to extra to endo	9	0	0.333333
SHRSHRGFPinSCRi_pCF_EC_2	SHR:SHR-GFP in SCRi	cortex to extra to endo	5	0
		cortex to extra to endo	7	0
		cortex to extra to endo	9	1	0.333333
SHRSHRGFPinSCRi_pCF_EC_3	SHR:SHR-GFP in SCRi	cortex to extra to endo	5	1
		cortex to extra to endo	7	0
		cortex to extra to endo	9	0	0.333333
SHRSHRGFPinSCRi_pCF_EC_4	SHR:SHR-GFP in SCRi	cortex to extra to endo	5	1
		cortex to extra to endo	7	1
		cortex to extra to endo	9	1	1
SHRSHRGFPinSCRi_pCF_EC_5	SHR:SHR-GFP in SCRi	cortex to extra to endo	5	0
		cortex to extra to endo	7	1
		cortex to extra to endo	9	0	0.333333
SHRSHRGFPinSCRi_pCF_EC_6	SHR:SHR-GFP in SCRi	cortex to extra to endo	5	0
		cortex to extra to endo	7	1
		cortex to extra to endo	9	1	0.666667
SHRSHRGFPinSCRi_pCF_EC_7	SHR:SHR-GFP in SCRi	cortex to extra to endo	5	1
		cortex to extra to endo	7	0
		cortex to extra to endo	9	0	0.333333
SHRSHRGFPinSCRi_pCF_EC_8	SHR:SHR-GFP in SCRi	cortex to extra to endo	5	1
		cortex to extra to endo	7	0
		cortex to extra to endo	9	1	0.666667
SHRSHRGFPinSCRi_pCF_EC_9	SHR:SHR-GFP in SCRi	cortex to extra to endo	5	0
		cortex to extra to endo	7	0
		cortex to extra to endo	9	1	0.333333
SHRSHRGFPinSCRi_pCF_EC_10	SHR:SHR-GFP in SCRi	cortex to extra to endo	5	1
		cortex to extra to endo	7	1
		cortex to extra to endo	9	1	1
SHRSHRGFPinSCRi_pCF_EC_11	SHR:SHR-GFP in SCRi	cortex to extra to endo	5	1
		cortex to extra to endo	7	1
		cortex to extra to endo	9	1	1
SHRSHRGFPinSCRi_pCF_EC_12	SHR:SHR-GFP in SCRi	cortex to extra to endo	5	1
		cortex to extra to endo	7	0
		cortex to extra to endo	9	1	0.666667
SHRSHRGFPinSCRi_pCF_EC_13	SHR:SHR-GFP in SCRi	cortex to extra to endo	5	0
		cortex to extra to endo	7	0
		cortex to extra to endo	9	1	0.333333
			MI:	0.588235	0.588235
