# Supplementary material for: Tracking transcription factor mobility and interaction in Arabidopsis roots with fluorescence correlation spectroscopy
Source: eLife journal article supplement (doi:10.7554/elife.14770), 2016-06-11
Supplement: supp [file elife-14770-supp-v1.zip › elife_poa_e14770_Figure_2_source_data_2.xlsx]

## Sheet: Fig 2 SD 2- pCF Statistics
Sample	Mean	SD	SE	Technical Replicates	Biological Replicates
35S:GFP	0.688889	0.277936	0.0717629	45	15
TMO5:3xGFP	0.263158	0.210201	0.0482235	57	19
SCR:SCR-GFP endo to cortex	0.309524	0.305625	0.0816817	42	14
SCR:SCR-GFP cortex to endo	0.309524	0.243349	0.0650377	42	14
SHR:SHR-GFP vasc to endo	0.583333	0.148087	0.0331133	60	20
SHR:SHR-GFP endo to vasc	0.366667	0.322635	0.0721435	60	20
SHR:SHR-GFP endo to cortex	0.606061	0.302308	0.0644523	66	22
SHR:SHR-GFP cortex to endo	0.530303	0.265455	0.0565953	66	22
SHR:SHR-GFP in SCRi vasc to endo	0.666667	0.261488	0.0698857	42	14
SHR:SHR-GFP in SCRi endo to vasc	0.785714	0.336069	0.0898183	42	14
SHR:SHR-GFP in SCRi endo to extra to cortex	0.607843	0.211978	0.0514122	51	17
SHR:SHR-GFP in SCRi cortex to extra to endo	0.588235	0.301142	0.0730376	51	17
Comparison	p-value
35S vs SHR in SCRi endo to vasc	0.9553
35S vs SHR in SCRi vasc to endo	0.9999
35S vs SHR endo to cortex	0.9524
35S vs SHR in SCRi endo to cortex	0.9997
35S vs SHR cortex to endo	0.3909
35S vs SHR in SCRi cortex to endo	0.551
35S vs SHR vasc to endo	0.6356
35S vs TMO5	0.0001
35S vs SCR endo to cortex	0.0236
35S vs SHR endo to vasc	0.0368
35S vs SCR cortex to endo	0.0054
TMO5 vs SHR in SCRi endo to vasc	0.0005
TMO5 vs SHR in SCRi vasc to endo	0.0003
TMO5 vs SHR endo to cortex	0.0047
TMO5 vs SHR in SCRi endo to cortex	0.0012
TMO5 vs SHR cortex to endo	0.0172
TMO5 vs SHR in SCRi cortex to endo	0.0144
TMO5 vs SHR vasc to endo	0.0001
TMO5 vs SCR endo to cortex	0.9905
TMO5 vs SHR endo to vasc	0.5974
TMO5 vs SCR cortex to endo	0.9997
