# Supplementary material for: Tracking transcription factor mobility and interaction in Arabidopsis roots with fluorescence correlation spectroscopy
Source: eLife journal article supplement (doi:10.7554/elife.14770), 2016-06-11
Supplement: supp [file elife-14770-supp-v1.zip › elife_poa_e14770_Figure_3_source_data_1.xlsx]

## Sheet: Fig 3 SD 1- SHR NB
Filename	Instrument	Location	Pixel Size (μm)	% Monomer	% Dimer
SHRSHRGFP_780_Vasc_1	Zeiss 780	Vasculature/endodermis	0.1	0.989856	0.0101443
SHRSHRGFP_780_Vasc_2	Zeiss 780	Vasculature/endodermis	0.1	0.974016	0.0259842
SHRSHRGFP_780_Vasc_3	Zeiss 780	Vasculature	0.05	0.992173	0.00782689
SHRSHRGFP_780_Vasc_4	Zeiss 780	Vasculature	0.1	0.970917	0.029083
SHRSHRGFP_780_Vasc_5	Zeiss 780	Vasculature/endodermis	0.1	0.995548	0.00445167
SHRSHRGFP_780_Vasc_6	Zeiss 780	Vasculature/endodermis	0.1	0.978367	0.0216327
SHRSHRGFP_780_Vasc_7	Zeiss 780	SCN and vasculature	0.1	0.990521	0.0094793
SHRSHRGFP_780_Vasc_8	Zeiss 780	Vasculature/Endodermis	0.05	0.98353	0.0164704
SHRSHRGFP_780_Vasc_9	Zeiss 780	Vasculature/Endodermis	0.05	0.990912	0.00908846
SHRSHRGFP_780_Vasc_10	Zeiss 780	Vasculature/Endodermis	0.05	0.978162	0.0218384
SHRSHRGFP_780_Vasc_11	Zeiss 780	Vasculature/endodermis	0.1	0.977157	0.0228431
SHRSHRGFP_780_Vasc_12	Zeiss 780	Vasculature/endodermis	0.1	0.980798	0.0192018
SHRSHRGFP_780_Vasc_13	Zeiss 780	SCN and vasculature	0.1	0.978255	0.0217446
SHRSHRGFP_780_Vasc_14	Zeiss 780	SCN and vasculature	0.1	0.989071	0.0109289
SHRSHRGFP_780_Vasc_15	Zeiss 780	Vasculature/endodermis	0.1	0.988125	0.0118746
SHRSHRGFP_780_Vasc_16	Zeiss 780	Vasculature/endodermis	0.1	0.990721	0.00927903
SHRSHRGFP_780_Vasc_17	Zeiss 780	Vasculature/endodermis	0.1	0.987118	0.012882
SHRSHRGFP_780_Vasc_18	Zeiss 780	SCN and vasculature	0.1	0.959828	0.0401721
SHRSHRGFP_780_Vasc_19	Zeiss 780	Vasculature/endodermis	0.1	0.983416	0.0165841
SHRSHRGFP_780_Vasc_20	Zeiss 780	Vasculature/endodermis	0.1	0.968582	0.0314182
SHRSHRGFP_780_Vasc_21	Zeiss 780	SCN and vasculature	0.1	0.976654	0.0233459
SHRSHRGFP_780_Vasc_22	Zeiss 780	Vasculature/endodermis	0.1	0.971646	0.0283541
SHRSHRGFP_780_Vasc_23	Zeiss 780	SCN and vasculature	0.1	0.979707	0.0202925
SHRSHRGFP_780_Vasc_24	Zeiss 780	Vasculature	0.05	0.97414	0.0258595
SHRSHRGFP_780_Vasc_25	Zeiss 780	Vasculature	0.05	0.97598	0.0240199
SHRSHRGFP_780_Vasc_26	Zeiss 780	Vasculature	0.05	0.978359	0.0216412
SHRSHRGFP_780_Vasc_27	Zeiss 780	Vasculature	0.05	0.974121	0.0258789
SHRSHRGFP_780_Vasc_28	Zeiss 780	Vasculature	0.05	0.969579	0.0304209
SHRSHRGFP_780_Vasc_29	Zeiss 780	Vasculature/endodermis	0.05	0.974863	0.0251367
SHRSHRGFP_780_Vasc_30	Zeiss 780	Vasculature	0.05	0.990725	0.00927549
			Average:	0.980428	0.0195718
			SD:	0.00859347	0.00859347
			SE:	0.00156895	0.00156895
Filename	Instrument	Location	Pixel Size (μm)	% Monomer	% Dimer
SHRSHRGFP_710_Vasc_1	Zeiss 710	Vasculature/SCN	0.1	0.944809	0.0551911
SHRSHRGFP_710_Vasc_2	Zeiss 710	Vasculature/SCN	0.1	0.948898	0.051102
SHRSHRGFP_710_Vasc_3	Zeiss 710	Vasculature/SCN	0.1	0.982769	0.0172306
SHRSHRGFP_710_Vasc_4	Zeiss 710	Vasculature/SCN	0.1	0.983151	0.016849
SHRSHRGFP_710_Vasc_5	Zeiss 710	Vasculature/SCN	0.1	0.965219	0.0347806
SHRSHRGFP_710_Vasc_6	Zeiss 710	Vasculature/SCN	0.1	0.978974	0.0210255
SHRSHRGFP_710_Vasc_7	Zeiss 710	Vasculature/SCN	0.1	0.918303	0.0816969
SHRSHRGFP_710_Vasc_8	Zeiss 710	Vasculature/SCN	0.1	0.929842	0.0701583
SHRSHRGFP_710_Vasc_9	Zeiss 710	SCN	0.1	0.939074	0.0609256
SHRSHRGFP_710_Vasc_10	Zeiss 710	Vasculature/endodermis	0.1	0.968402	0.0315977
			Average:	0.955944	0.0440557
			SD:	0.0230648	0.0230648
			SE:	0.00729373	0.00729373
			Grand Mean:	0.974307	0.0256928
			Grand SD:	0.0171161	0.0171161
			Grand SE:	0.00270629	0.00270629
Filename	Instrument	Location	Pixel Size (μm)	% Monomer	% Dimer
SHRSHRGFP_780_Endo_1	Zeiss 780	Endodermis	0.05	0.991975	0.00802544
SHRSHRGFP_780_Endo_2	Zeiss 780	Endodermis	0.1	0.94394	0.05606
SHRSHRGFP_780_Endo_3	Zeiss 780	Endodermis	0.1	0.879019	0.120981
SHRSHRGFP_780_Endo_4	Zeiss 780	Endodermis	0.1	0.906564	0.093436
SHRSHRGFP_780_Endo_5	Zeiss 780	Endodermis	0.1	0.944632	0.0553681
SHRSHRGFP_780_Endo_6	Zeiss 780	Endodermis	0.1	0.870123	0.129877
SHRSHRGFP_780_Endo_7	Zeiss 780	Endodermis	0.1	0.932828	0.0671718
SHRSHRGFP_780_Endo_8	Zeiss 780	Endodermis	0.1	0.925301	0.0746991
SHRSHRGFP_780_Endo_9	Zeiss 780	Endodermis	0.05	0.979177	0.0208231
SHRSHRGFP_780_Endo_10	Zeiss 780	Endodermis	0.05	0.937223	0.0627767
SHRSHRGFP_780_Endo_11	Zeiss 780	Endodermis	0.05	0.932056	0.067944
			Average:	0.931167	0.068833
			SD:	0.0367052	0.0367052
			SE:	0.011067	0.011067
Filename	Instrument	Location	Pixel Size (μm)	% Monomer	% Dimer
SHRSHRGFP_710_Endo_1	Zeiss 710	Endodermis	0.1	0.870763	0.129237
SHRSHRGFP_710_Endo_2	Zeiss 710	Endodermis	0.1	0.975828	0.0241721
SHRSHRGFP_710_Endo_3	Zeiss 710	Endodermis	0.1	0.944539	0.055461
SHRSHRGFP_710_Endo_4	Zeiss 710	Endodermis	0.1	0.921058	0.0789421
SHRSHRGFP_710_Endo_5	Zeiss 710	Endodermis	0.06	0.850438	0.149562
SHRSHRGFP_710_Endo_6	Zeiss 710	Endodermis	0.06	0.93837	0.0616299
SHRSHRGFP_710_Endo_7	Zeiss 710	Endodermis	0.08	0.955735	0.0442648
SHRSHRGFP_710_Endo_8	Zeiss 710	Endodermis	0.1	0.881705	0.118295
			Average:	0.917304	0.0826955
			SD:	0.044731	0.044731
			SE:	0.0158148	0.0158148
			Grand Mean:	0.92533	0.0746698
			Grand SD:	0.0396994	0.0396994
			Grand SE:	0.00910767	0.00910767
