# Supplementary material for: Tracking transcription factor mobility and interaction in Arabidopsis roots with fluorescence correlation spectroscopy
Source: eLife journal article supplement (doi:10.7554/elife.14770), 2016-06-11
Supplement: supp [file elife-14770-supp-v1.zip › elife_poa_e14770_Figure_3_source_data_2.xlsx]

## Sheet: Fig 3 SD 2-SHR in SCRi NB
Filename	Instrument	Location	Pixel Size (μm)	% Monomer	% Dimer
SHRSHRGFPinSCRi_1	Zeiss 780	Vasculature/ Endodermis	0.1	0.990882	0.00911844
SHRSHRGFPinSCRi_2	Zeiss 780	Endodermis	0.05	0.992278	0.00772201
SHRSHRGFPinSCRi_3	Zeiss 780	Vasculature	0.05	0.965273	0.0347273
SHRSHRGFPinSCRi_4	Zeiss 780	Vasculature	0.05	0.971417	0.0285827
SHRSHRGFPinSCRi_5	Zeiss 780	Vasculature and SCN	0.05	0.960402	0.0395984
SHRSHRGFPinSCRi_6	Zeiss 780	Vasculature/Endodermis	0.1	0.952765	0.0472353
SHRSHRGFPinSCRi_7	Zeiss 780	Vasculature	0.1	0.978806	0.0211939
SHRSHRGFPinSCRi_8	Zeiss 780	Vasculature	0.1	0.985501	0.0144986
SHRSHRGFPinSCRi_9	Zeiss 780	Vasculature	0.1	0.982949	0.0170506
SHRSHRGFPinSCRi_10	Zeiss 780	Vasculature/ Endodermis	0.1	0.993854	0.00614604
SHRSHRGFPinSCRi_11	Zeiss 780	Vasculature/ Endodermis	0.1	0.981614	0.0183863
SHRSHRGFPinSCRi_12	Zeiss 780	Vasculature	0.1	0.987226	0.0127738
SHRSHRGFPinSCRi_13	Zeiss 780	Vasculature	0.1	0.993689	0.00631089
SHRSHRGFPinSCRi_14	Zeiss 780	Vasculature/ Endodermis	0.1	0.998027	0.00197304
			Average:	0.981049	0.0189512
			SD:	0.0137832	0.0137832
			SE:	0.00368371	0.00368371
