# Supplementary material for: Tracking transcription factor mobility and interaction in Arabidopsis roots with fluorescence correlation spectroscopy
Source: eLife journal article supplement (doi:10.7554/elife.14770), 2016-06-11
Supplement: supp [file elife-14770-supp-v1.zip › elife_poa_e14770_Figure_3_source_data_3.xlsx]

## Sheet: Fig 3 SD 3- NB Statistics
Sample	Mean	SD	SE	Sample Size
SHR:SHR-GFP in shr2 Vasc	0.0256928	0.0171161	0.00270629	40
SHR:SHR-GFP in shr2 Endo	0.0746698	0.0396994	0.00910767	19
SHR:SHR-GFP in SCRi	0.0189512	0.0137832	0.00368371	14
Comparison	p-value
Vasc vs SCRi	0.2546
SCRi vs Endo	<0.0001
Vasc vs Endo	<0.0001
