# Supplementary material for: Tracking transcription factor mobility and interaction in Arabidopsis roots with fluorescence correlation spectroscopy
Source: eLife journal article supplement (doi:10.7554/elife.14770), 2016-06-11
Supplement: supp [file elife-14770-supp-v1.zip › elife_poa_e14770_Figure_4_source_data_1.xlsx]

## Sheet: Fig 4 SD 1- SCR NB
Filename	Instrument	Line	Location	Pixel Size (μm)	% Monomer	% Dimer
SCRSCRGFP_1	Zeiss 780	SCRSCRGFP	Endodermis	0.1	0.943396	0.0566038
SCRSCRGFP_2	Zeiss 780	SCRSCRGFP	SCN	0.1	0.961476	0.0385239
SCRSCRGFP_3	Zeiss 780	SCRSCRGFP	Endodermis	0.05	0.972342	0.0276583
SCRSCRGFP_4	Zeiss 780	SCRSCRGFP	Endodermis	0.1	0.921105	0.078895
SCRSCRGFP_5	Zeiss 780	SCRSCRGFP	Endodermis	0.1	0.923323	0.0766772
SCRSCRGFP_6	Zeiss 780	SCRSCRGFP	Endodermis	0.1	0.916469	0.0835306
SCRSCRGFP_7	Zeiss 780	SCRSCRGFP	Endodermis	0.1	0.968528	0.0314719
SCRSCRGFP_8	Zeiss 780	SCRSCRGFP	Endodermis/SCN	0.1	0.937093	0.0629067
SCRSCRGFP_9	Zeiss 780	SCRSCRGFP	Endodermis/SCN	0.1	0.921644	0.0783559
SCRSCRGFP_10	Zeiss 780	SCRSCRGFP	Endodermis	0.1	0.94246	0.0575397
SCRSCRGFP_11	Zeiss 780	SCRSCRGFP	Endodermis	0.1	0.923601	0.0763986
SCRSCRGFP_12	Zeiss 780	SCRSCRGFP	Endodermis	0.1	0.990386	0.00961357
SCRSCRGFP_13	Zeiss 780	SCRSCRGFP	Endodermis	0.1	0.970837	0.0291627
				Average:	0.945589	0.0544106
				SD:	0.024538	0.024538
				SE:	0.00680563	0.00680563
Image	Instrument	Line	Location	Pixel Size (μm)	% Monomer	% Dimer
SHRSHRGFP_SCRSCRmCherry_1	Zeiss 780	SCRSCRmCherry	Endodermis	0.1	0.919392	0.0806079
SHRSHRGFP_SCRSCRmCherry_2	Zeiss 780	SCRSCRmCherry	SCN	0.1	0.923892	0.0761079
SHRSHRGFP_SCRSCRmCherry_3	Zeiss 780	SCRSCRmCherry	Endodermis	0.1	0.980892	0.0191083
SHRSHRGFP_SCRSCRmCherry_4	Zeiss 780	SCRSCRmCherry	Endodermis	0.1	0.944132	0.0558682
SHRSHRGFP_SCRSCRmCherry_5	Zeiss 780	SCRSCRmCherry	Endodermis	0.1	0.916469	0.0835306
SHRSHRGFP_SCRSCRmCherry_6	Zeiss 780	SCRSCRmCherry	Endodermis	0.1	0.934769	0.0652306
SHRSHRGFP_SCRSCRmCherry_7	Zeiss 780	SCRSCRmCherry	Endodermis	0.1	0.965402	0.0345983
SHRSHRGFP_SCRSCRmCherry_8	Zeiss 780	SCRSCRmCherry	Endodermis	0.1	0.950737	0.0492626
SHRSHRGFP_SCRSCRmCherry_9	Zeiss 780	SCRSCRmCherry	Endodermis	0.1	0.943031	0.0569687
SHRSHRGFP_SCRSCRmCherry_10	Zeiss 780	SCRSCRmCherry	SCN	0.1	0.960736	0.0392641
SHRSHRGFP_SCRSCRmCherry_11	Zeiss 780	SCRSCRmCherry	Endodermis	0.1	0.973408	0.0265923
SHRSHRGFP_SCRSCRmCherry_12	Zeiss 780	SCRSCRmCherry	Endodermis	0.1	0.96134	0.0386598
SHRSHRGFP_SCRSCRmCherry_13	Zeiss 780	SCRSCRmCherry	SCN	0.1	0.948564	0.051436
SHRSHRGFP_SCRSCRmCherry_14	Zeiss 780	SCRSCRmCherry	SCN	0.1	0.971751	0.0282489
SHRSHRGFP_SCRSCRmCherry_15	Zeiss 780	SCRSCRmCherry	Endodermis	0.1	0.981723	0.018277
SHRSHRGFP_SCRSCRmCherry_16	Zeiss 780	SCRSCRmCherry	Endodermis	0.1	0.966337	0.0336629
SHRSHRGFP_SCRSCRmCherry_17	Zeiss 780	SCRSCRmCherry	SCN	0.1	0.96215	0.0378499
				Average:	0.953219	0.0467808
				SD:	0.020557	0.020557
				SE:	0.00498581	0.00498581
