# Supplementary material for: Tracking transcription factor mobility and interaction in Arabidopsis roots with fluorescence correlation spectroscopy
Source: eLife journal article supplement (doi:10.7554/elife.14770), 2016-06-11
Supplement: supp [file elife-14770-supp-v1.zip › elife_poa_e14770_Figure_4_source_data_2.xlsx]

## Sheet: Figure 4 SD 2 - Cross N+B
Image	Location	1 SHR: 1 SCR	2 SHR: 1 SCR
SHRSHRGFP_SCRSCRmCherry_1	Endodermis	0.914093	0.0859072
SHRSHRGFP_SCRSCRmCherry_2	SCN	0.744626	0.255374
SHRSHRGFP_SCRSCRmCherry_3	Endodermis	0.8651	0.1349
SHRSHRGFP_SCRSCRmCherry_4	Endodermis	0.876621	0.123379
SHRSHRGFP_SCRSCRmCherry_5	Endodermis	0.898346	0.101654
SHRSHRGFP_SCRSCRmCherry_6	Endodermis	0.925131	0.0748687
SHRSHRGFP_SCRSCRmCherry_7	Endodermis	0.943457	0.0565425
SHRSHRGFP_SCRSCRmCherry_8	Endodermis	0.879837	0.120163
SHRSHRGFP_SCRSCRmCherry_9	Endodermis	0.894857	0.105143
SHRSHRGFP_SCRSCRmCherry_10	SCN	0.772931	0.227069
SHRSHRGFP_SCRSCRmCherry_11	Endodermis	0.89032	0.10968
SHRSHRGFP_SCRSCRmCherry_12	Endodermis	0.849313	0.150687
SHRSHRGFP_SCRSCRmCherry_13	SCN	0.75177	0.24823
SHRSHRGFP_SCRSCRmCherry_14	SCN	0.758298	0.241702
SHRSHRGFP_SCRSCRmCherry_15	Endodermis	0.79277	0.20723
SHRSHRGFP_SCRSCRmCherry_16	Endodermis	0.861066	0.138934
SHRSHRGFP_SCRSCRmCherry_17	SCN	0.792775	0.207225
	Average	0.847724	0.152276
	SD	0.0651802	0.0651802
	SE	0.0158085	0.0158085
