# Supplementary material for: Tracking transcription factor mobility and interaction in Arabidopsis roots with fluorescence correlation spectroscopy
Source: eLife journal article supplement (doi:10.7554/elife.14770), 2016-06-11
Supplement: supp [file elife-14770-supp-v1.zip › elife_poa_e14770_Figure_5_source_data_1.xlsx]

## Sheet: Fig 5 SD 1 - Sobol
	Model outcome: Sv
	Parameter
Replicate	k1	a1	a2	d1	d2	k2	d3	k3	K1D	K2D	d4	k4	d5	k5	k6
1	0.831851	0.704001	-0.402888	3.29642	-0.39141	-0.403797	-0.403797	-0.403797	-0.403797	-0.403797	-0.403797	-0.403797	-0.403797	-0.403797	-0.403797
2	0.788575	0.0576775	-0.362404	3.4408	-0.295854	-0.36288	-0.36288	-0.36288	-0.36288	-0.36288	-0.36288	-0.36288	-0.36288	-0.36288	-0.36288
3	1.53547	-0.178311	-0.37546	3.14931	-0.374681	-0.375633	-0.375633	-0.375633	-0.375633	-0.375633	-0.375633	-0.375633	-0.375633	-0.375633	-0.375633
4	0.366344	1.91973	-0.426091	2.82851	-0.424115	-0.426439	-0.426439	-0.426439	-0.426439	-0.426439	-0.426439	-0.426439	-0.426439	-0.426439	-0.426439
5	1.69723	0.8854	-0.449179	2.81245	-0.443476	-0.450242	-0.450242	-0.450242	-0.450242	-0.450242	-0.450242	-0.450242	-0.450242	-0.450242	-0.450242
6	0.388994	-0.245831	-0.308368	3.55636	-0.306567	-0.308459	-0.308459	-0.308459	-0.308459	-0.308459	-0.308459	-0.308459	-0.308459	-0.308459	-0.308459
7	0.34681	1.37864	-0.407816	3.1606	-0.393453	-0.408478	-0.408478	-0.408478	-0.408478	-0.408478	-0.408478	-0.408478	-0.408478	-0.408478	-0.408478
8	0.289756	0.334146	-0.344961	3.5178	-0.342691	-0.345405	-0.345405	-0.345405	-0.345405	-0.345405	-0.345405	-0.345405	-0.345405	-0.345405	-0.345405
9	1.82722	-0.0773558	-0.386406	2.96628	-0.34222	-0.398752	-0.398752	-0.398752	-0.398752	-0.398752	-0.398752	-0.398752	-0.398752	-0.398752	-0.398752
10	0.419535	0.516122	-0.366072	3.45684	-0.364974	-0.366145	-0.366145	-0.366145	-0.366145	-0.366145	-0.366145	-0.366145	-0.366145	-0.366145	-0.366145
Mean	0.849179	0.529422	-0.382964	3.21854	-0.367944	-0.384623	-0.384623	-0.384623	-0.384623	-0.384623	-0.384623	-0.384623	-0.384623	-0.384623	-0.384623
SD	0.609695	0.71042	0.0408844	0.279831	0.0475857	0.0413988	0.0413988	0.0413988	0.0413988	0.0413988	0.0413988	0.0413988	0.0413988	0.0413988	0.0413988
SE	0.192802	0.224654	0.0129288	0.0884903	0.0150479	0.0130915	0.0130915	0.0130915	0.0130915	0.0130915	0.0130915	0.0130915	0.0130915	0.0130915	0.0130915
Group 1	Group 2	p-Value
d1	a1	0.0151
d1	a2	0.0151
k1	a2	0.0151
k1	d2	0.0151
k1	d3	0.0151
k1	d4	0.0151
k1	d5	0.0151
k1	d6	0.0151
k1	a1	0.999
d2	a2	0.9999
k2	K1D	1
k3	K1D	1
k4	K1D	1
k5	K1D	1
K2D	K1D	1
k4	d5	1
k4	K2D	1
k4	k3	1
d6	d5	1
k5	K2D	1
k5	k3	1
k2	d5	1
k2	d6	1
k4	k2	1
k5	d5	1
k2	d3	1
d4	d3	1
d6	d3	1
k3	K2D	1
k4	d3	1
k4	d6	1
k5	d6	1
d6	d4	1
k2	d4	1
k4	d4	1
k5	d3	1
k5	k2	1
k5	k4	1
K2D	d5	1
k3	d5	1
k3	k2	1
k5	d4	1
d5	d3	1
d5	d4	1
K2D	k2	1
K1D	d5	1
K2D	d3	1
K2D	d4	1
K2D	d6	1
k3	d3	1
k3	d4	1
k3	d6	1
d3	a2	1
d4	a2	1
d5	a2	1
d6	a2	1
K1D	a2	1
K1D	d3	1
K1D	d4	1
K1D	d6	1
k2	a2	1
K2D	a2	1
k3	a2	1
k4	a2	1
k5	a2	1
d3	d2	0.9996
d4	d2	0.9996
d5	d2	0.9996
d6	d2	0.9996
K1D	d2	0.9996
k2	d2	0.9996
K2D	d2	0.9996
k3	d2	0.9996
k4	d2	0.9996
k5	d2	0.9996
a2	a1	0.0151
d2	a1	0.0151
d2	d1	0.0151
d3	a1	0.0151
d3	d1	0.0151
d4	a1	0.0151
d4	d1	0.0151
d5	a1	0.0151
d5	d1	0.0151
d6	a1	0.0151
d6	d1	0.0151
k1	d1	0.0151
K1D	a1	0.0151
K1D	d1	0.0151
K1D	k1	0.0151
k2	a1	0.0151
k2	d1	0.0151
k2	k1	0.0151
K2D	a1	0.0151
K2D	d1	0.0151
K2D	k1	0.0151
k3	a1	0.0151
k3	d1	0.0151
k3	k1	0.0151
k4	a1	0.0151
k4	d1	0.0151
k4	k1	0.0151
k5	a1	0.0151
k5	d1	0.0151
k5	k1	0.0151
	Model outcome: Se
	Parameter
Replicate	k1	a1	a2	d1	d2	k2	d3	k3	K1D	K2D	d4	k4	d5	k5	k6
1	0.660269	-0.402814	0.130161	2.14507	2.50012	-0.503281	-0.503281	-0.503281	-0.503281	-0.503281	-0.503281	-0.503281	-0.503281	-0.503281	-0.503281
2	-0.25467	-0.251456	-0.260111	-0.219002	3.61455	-0.262931	-0.262931	-0.262931	-0.262931	-0.262931	-0.262931	-0.262931	-0.262931	-0.262931	-0.262931
3	0.18008	0.350028	-0.237101	1.92935	2.75485	-0.497721	-0.497721	-0.497721	-0.497721	-0.497721	-0.497721	-0.497721	-0.497721	-0.497721	-0.497721
4	1.59325	2.57945	-0.146854	0.662987	1.03481	-0.572365	-0.572365	-0.572365	-0.572365	-0.572365	-0.572365	-0.572365	-0.572365	-0.572365	-0.572365
5	-0.117578	-0.471825	1.62037	1.97455	2.14224	-0.514775	-0.514775	-0.514775	-0.514775	-0.514775	-0.514775	-0.514775	-0.514775	-0.514775	-0.514775
6	-0.14606	-0.224313	-0.27216	3.5162	0.558884	-0.343255	-0.343255	-0.343255	-0.343255	-0.343255	-0.343255	-0.343255	-0.343255	-0.343255	-0.343255
7	-0.2029	-0.0426035	-0.319528	1.69916	3.03766	-0.417179	-0.417179	-0.417179	-0.417179	-0.417179	-0.417179	-0.417179	-0.417179	-0.417179	-0.417179
8	0.475215	0.833909	-0.264765	1.33974	2.90169	-0.528579	-0.528579	-0.528579	-0.528579	-0.528579	-0.528579	-0.528579	-0.528579	-0.528579	-0.528579
9	2.00888	0.134963	-0.0328158	0.708499	2.55929	-0.537882	-0.537882	-0.537882	-0.537882	-0.537882	-0.537882	-0.537882	-0.537882	-0.537882	-0.537882
10	0.754463	0.299208	-0.421481	1.7917	2.70591	-0.51298	-0.51298	-0.51298	-0.51298	-0.51298	-0.51298	-0.51298	-0.51298	-0.51298	-0.51298
Mean	0.495096	0.280455	-0.0204288	1.55482	2.381	-0.469095	-0.469095	-0.469095	-0.469095	-0.469095	-0.469095	-0.469095	-0.469095	-0.469095	-0.469095
SD	0.783686	0.900181	0.597103	1.01615	0.92524	0.0977353	0.0977353	0.0977353	0.0977353	0.0977353	0.0977353	0.0977353	0.0977353	0.0977353	0.0977353
SE	0.247823	0.284662	0.18882	0.321336	0.292586	0.0309066	0.0309066	0.0309066	0.0309066	0.0309066	0.0309066	0.0309066	0.0309066	0.0309066	0.0309066
Group 1	Group 2	p-Value
k1	d3	0.0151
k1	d4	0.0151
k1	d5	0.0151
k1	d6	0.0151
d2	a2	0.0259
d2	a1	0.0687
d1	a2	0.0859
d1	a1	0.4169
k1	a2	0.643
d2	d1	0.8395
k1	a1	0.9999
d6	d5	1
K2D	K1D	1
k4	K1D	1
k2	K1D	1
k3	K1D	1
k4	d3	1
k4	d4	1
k4	k3	1
d4	d3	1
d6	d3	1
k2	d5	1
k3	d5	1
k3	K2D	1
k4	d5	1
k4	K2D	1
k5	K1D	1
k5	K2D	1
k5	k3	1
d6	d4	1
k2	d4	1
K2D	d3	1
K2D	k2	1
k3	d4	1
k4	d6	1
k4	k2	1
k5	d4	1
k5	d5	1
k5	k2	1
d5	d4	1
K1D	d4	1
K1D	d5	1
k2	d3	1
k2	d6	1
K2D	d5	1
k3	d3	1
k3	d6	1
k3	k2	1
k5	d3	1
k5	d6	1
d5	d3	1
K1D	d3	1
K1D	d6	1
K2D	d4	1
K2D	d6	1
k5	k4	1
a2	a1	0.999
k1	d1	0.6977
d3	a2	0.0687
d4	a2	0.0687
d5	a2	0.0687
d6	a2	0.0687
k1	d2	0.0687
K1D	a2	0.0687
k2	a2	0.0687
K2D	a2	0.0687
k3	a2	0.0687
k4	a2	0.0687
k5	a2	0.0687
d3	a1	0.0545
d4	a1	0.0545
d5	a1	0.0545
d6	a1	0.0545
K1D	a1	0.0545
k2	a1	0.0545
K2D	a1	0.0545
k3	a1	0.0545
k4	a1	0.0545
k5	a1	0.0545
d3	d1	0.0151
d3	d2	0.0151
d4	d1	0.0151
d4	d2	0.0151
d5	d1	0.0151
d5	d2	0.0151
d6	d1	0.0151
d6	d2	0.0151
K1D	d1	0.0151
K1D	d2	0.0151
K1D	k1	0.0151
k2	d1	0.0151
k2	d2	0.0151
k2	k1	0.0151
K2D	d1	0.0151
K2D	d2	0.0151
K2D	k1	0.0151
k3	d1	0.0151
k3	d2	0.0151
k3	k1	0.0151
k4	d1	0.0151
k4	d2	0.0151
k4	k1	0.0151
k5	d1	0.0151
k5	d2	0.0151
k5	k1	0.0151
	Model outcome: S2e
	Parameter
Replicate	k1	a1	a2	d1	d2	k2	d3	k3	K1D	K2D	d4	k4	d5	k5	k6
1	1.18354	-0.570981	0.68312	1.8488	1.86328	-0.15753	0.884073	-0.716788	-0.716788	-0.716788	-0.716788	-0.716788	-0.716788	-0.716788	-0.716788
2	-0.258039	-0.258228	-0.258236	-0.258011	3.61478	-0.258199	-0.258036	-0.258254	-0.258254	-0.258254	-0.258254	-0.258254	-0.258254	-0.258254	-0.258254
3	-0.247576	-0.172905	-0.286012	3.60385	-0.0203915	-0.21483	-0.227607	-0.304317	-0.304317	-0.304317	-0.304317	-0.304317	-0.304317	-0.304317	-0.304317
4	-0.0840254	-0.0667598	-0.142386	-0.197992	-0.191339	0.0330067	3.58018	-0.366336	-0.366336	-0.366336	-0.366336	-0.366336	-0.366336	-0.366336	-0.366336
5	-0.220643	-0.420666	1.26773	0.156887	3.23521	-0.368051	-0.174895	-0.434447	-0.434447	-0.434447	-0.434447	-0.434447	-0.434447	-0.434447	-0.434447
6	-0.257558	-0.258	-0.258096	3.61478	-0.256218	-0.258465	-0.257763	-0.258585	-0.258585	-0.258585	-0.258585	-0.258585	-0.258585	-0.258585	-0.258585
7	-0.471421	0.777876	-0.379539	2.09525	2.06043	0.712889	0.554383	-0.668733	-0.668733	-0.668733	-0.668733	-0.668733	-0.668733	-0.668733	-0.668733
8	-0.29993	-0.152428	-0.366178	-0.263852	0.0386238	0.961003	3.37666	-0.411738	-0.411738	-0.411738	-0.411738	-0.411738	-0.411738	-0.411738	-0.411738
9	-0.257567	-0.258671	-0.258594	-0.258113	-0.254828	-0.257368	3.61478	-0.258705	-0.258705	-0.258705	-0.258705	-0.258705	-0.258705	-0.258705	-0.258705
10	-0.260584	-0.260515	-0.26439	3.61437	-0.231682	-0.213157	-0.262118	-0.265241	-0.265241	-0.265241	-0.265241	-0.265241	-0.265241	-0.265241	-0.265241
Mean	-0.11738	-0.164128	-0.0262578	1.3956	0.985787	-0.00207016	1.08297	-0.394314	-0.394314	-0.394314	-0.394314	-0.394314	-0.394314	-0.394314	-0.394314
SD	0.466594	0.359676	0.549463	1.75486	1.55476	0.457573	1.72984	0.170645	0.170645	0.170645	0.170645	0.170645	0.170645	0.170645	0.170645
SE	0.14755	0.11374	0.173755	0.554937	0.491658	0.144697	0.547023	0.0539626	0.0539626	0.0539626	0.0539626	0.0539626	0.0539626	0.0539626	0.0539626
Level	- Level	p-Value
k2	d4	0.0859
k2	d5	0.0859
k2	d6	0.0859
k2	K1D	0.0859
k1	d4	0.3642
k1	d5	0.3642
k1	d6	0.3642
d2	a2	0.4169
d1	a2	0.5289
d2	a1	0.5289
d3	a2	0.6977
d1	a1	0.7969
d3	a1	0.9078
k2	a2	0.9979
k2	a1	0.9996
k2	k1	0.9996
k1	a2	1
K2D	K1D	1
k4	K1D	1
k1	a1	1
k4	k3	1
d6	d5	1
k3	d6	1
k3	K1D	1
k4	d5	1
k5	K1D	1
d2	d1	1
k3	d5	1
k4	K2D	1
d5	d4	1
d6	d4	1
K2D	d4	1
k3	d4	1
k3	K2D	1
k4	d6	1
a2	a1	1
K1D	d5	1
K1D	d6	1
K2D	d6	1
k4	d4	1
k5	d5	1
k5	d6	1
k5	K2D	1
k5	k3	1
k5	k4	1
K1D	d4	1
K2D	d5	1
k5	d4	1
d3	d1	1
d3	d2	1
k2	d3	0.9996
k2	d1	0.9688
k1	d3	0.9334
k2	d2	0.9334
k1	d1	0.8395
d4	a1	0.643
d4	a2	0.643
d5	a1	0.643
d5	a2	0.643
d6	a1	0.643
d6	a2	0.643
K1D	a1	0.643
K1D	a2	0.643
K2D	a1	0.643
K2D	a2	0.643
k3	a1	0.643
k3	a2	0.643
k4	a1	0.643
k4	a2	0.643
k5	a1	0.643
k5	a2	0.643
k1	d2	0.3642
K1D	k1	0.3642
K2D	k1	0.3642
k3	k1	0.3642
k4	k1	0.3642
k5	k1	0.3642
K2D	k2	0.0859
k3	k2	0.0859
k4	k2	0.0859
k5	k2	0.0859
d4	d1	0.0334
d4	d3	0.0334
d5	d1	0.0334
d5	d3	0.0334
d6	d1	0.0334
d6	d3	0.0334
K1D	d1	0.0334
K1D	d3	0.0334
K2D	d1	0.0334
K2D	d3	0.0334
k3	d1	0.0334
k3	d3	0.0334
k4	d1	0.0334
k4	d3	0.0334
k5	d1	0.0334
k5	d3	0.0334
d4	d2	0.0151
d5	d2	0.0151
d6	d2	0.0151
K1D	d2	0.0151
K2D	d2	0.0151
k3	d2	0.0151
k4	d2	0.0151
k5	d2	0.0151
	Model outcome: C
	Parameter
Replicate	k1	a1	a2	d1	d2	k2	d3	k3	K1D	K2D	d4	k4	d5	k5	k6
1	-0.337929	-0.337918	-0.337934	-0.33791	-0.337906	-0.337933	-0.337933	0.70621	-0.337688	-0.13184	3.48048	-0.337919	-0.337911	-0.337934	-0.337933
2	-0.329519	-0.329542	-0.329545	-0.329446	-0.329467	-0.329547	-0.329547	0.560423	-0.329527	-0.127846	3.51704	-0.329514	-0.324874	-0.329547	-0.329547
3	-0.316226	-0.316226	-0.316227	-0.316227	-0.316225	-0.316227	-0.316227	0.341199	-0.316225	-0.106302	3.55982	-0.316227	-0.316225	-0.316227	-0.316227
4	-0.377007	-0.377008	-0.377017	-0.376971	-0.376993	-0.377016	-0.377016	1.15953	-0.376994	0.0558573	3.3086	-0.376987	-0.376944	-0.377017	-0.377017
5	-0.388439	-0.389624	-0.389697	-0.383304	-0.385125	-0.389711	-0.389711	1.39174	-0.387679	0.0511752	3.20333	-0.387813	-0.375713	-0.389711	-0.389709
6	-0.325385	-0.325392	-0.325397	-0.32421	-0.325061	-0.325398	-0.325398	0.50833	-0.32505	-0.135895	3.52911	-0.325328	-0.32413	-0.325398	-0.325398
7	-0.364488	-0.364488	-0.36449	-0.36447	-0.364475	-0.36449	-0.36449	3.26916	-0.364476	-0.192693	1.2968	-0.364473	-0.364125	-0.36449	-0.364305
8	-0.341383	-0.341383	-0.341384	-0.341259	-0.341381	-0.341383	-0.341381	0.686063	-0.341382	-0.0718192	3.4822	-0.341381	-0.341367	-0.341383	-0.341383
9	-0.368238	-0.368233	-0.36824	-0.368238	-0.368238	-0.36824	-0.36824	1.2784	-0.368238	-0.133781	3.27423	-0.368236	-0.368235	-0.368239	-0.36824
10	-0.360899	-0.360899	-0.360901	-0.360884	-0.360868	-0.3609	-0.3609	1.32423	-0.360899	-0.252296	3.25881	-0.360899	-0.360891	-0.3609	-0.3609
Mean	-0.350951	-0.351071	-0.351083	-0.350292	-0.350574	-0.351085	-0.351084	1.12253	-0.350816	-0.104544	3.19104	-0.350878	-0.349042	-0.351085	-0.351066
SD	0.0241412	0.0243451	0.0243577	0.0234449	0.0236271	0.0243599	0.0243601	0.844219	0.0240623	0.0964812	0.678132	0.0240384	0.0228293	0.0243599	0.0243483
SE	0.00763411	0.00769859	0.00770258	0.00741394	0.00747154	0.00770329	0.00770335	0.266965	0.00760917	0.03051	0.214444	0.0076016	0.00721925	0.00770327	0.00769962
Group 1	Group 2	p-Value
d4	a1	0.0151
d4	a2	0.0151
d4	d1	0.0151
d4	d2	0.0151
d4	d3	0.0151
K2D	a1	0.0151
K2D	a2	0.0151
K2D	d1	0.0151
K2D	d2	0.0151
K2D	d3	0.0151
K2D	d5	0.0151
K2D	d6	0.0151
K2D	k1	0.0151
K2D	K1D	0.0151
K2D	k2	0.0151
k3	a1	0.0151
k3	a2	0.0151
k3	d1	0.0151
k3	d2	0.0151
k3	d3	0.0151
k3	d5	0.0151
k3	d6	0.0151
k3	k1	0.0151
k3	K1D	0.0151
k3	k2	0.0151
k3	K2D	0.0151
d5	a2	1
d5	d3	1
d5	a1	1
d1	a2	1
d2	a2	1
d5	d2	1
k1	a2	1
K1D	a2	1
k4	a2	1
k4	k2	1
d2	a1	1
k1	d3	1
k1	d6	1
K1D	d3	1
K1D	d6	1
k4	d3	1
k4	d6	1
k4	k1	1
d1	a1	1
d5	d1	1
K1D	a1	1
d6	a2	1
K1D	k1	1
k4	a1	1
d3	a2	1
d6	d3	1
k2	a2	1
k4	K1D	1
k5	a2	1
k1	a1	1
k5	k2	1
K1D	d2	1
k2	d6	1
d2	d1	1
k2	d3	1
k4	d2	1
k5	d6	1
d6	d1	1
k1	d1	1
K1D	d1	1
k4	d1	1
k5	d3	1
d3	a1	1
d6	a1	1
d6	d2	1
k1	d2	1
k2	a1	1
k2	k1	1
a2	a1	1
d3	d1	1
d3	d2	1
K1D	d5	1
k2	d1	1
k2	d2	1
k2	K1D	1
k5	a1	1
k5	d1	1
k5	d2	1
k5	k1	1
k5	K1D	1
k5	k4	1
d6	d5	1
k1	d5	1
k2	d5	1
k4	d5	1
k5	d5	1
k3	d4	0.0545
d5	d4	0.0151
d6	d4	0.0151
k1	d4	0.0151
K1D	d4	0.0151
k2	d4	0.0151
K2D	d4	0.0151
k4	d4	0.0151
k4	K2D	0.0151
k4	k3	0.0151
k5	d4	0.0151
k5	K2D	0.0151
k5	k3	0.0151
	Model outcome: SC
	Parameter
Replicate	k1	a1	a2	d1	d2	k2	d3	k3	K1D	K2D	d4	k4	d5	k5	k6
1	-0.373715	-0.1813	-0.647205	0.253223	-0.513405	-0.65444	-0.654439	-0.27491	-0.653905	1.27273	2.05144	-0.502424	2.18721	-0.654422	-0.654439
2	-0.254309	-0.267192	-0.267792	-0.23252	-0.237052	-0.268467	-0.268467	-0.255466	-0.268465	-0.267011	-0.231204	-0.259565	3.61444	-0.268467	-0.268467
3	-0.258007	-0.258229	-0.258287	-0.258068	-0.25817	-0.258288	-0.258288	-0.258121	-0.258285	-0.258211	3.61478	-0.258169	-0.258086	-0.258288	-0.258288
4	-0.269007	-0.671285	-0.775038	1.10229	-0.336509	-0.776095	-0.776095	0.291912	-0.776074	0.68423	1.45897	-0.0245852	2.41948	-0.776095	-0.776095
5	-0.203561	-0.473418	-0.489129	0.108826	0.0279614	-0.493976	-0.493976	0.575128	-0.485857	-0.489838	0.143976	-0.152249	3.41406	-0.493976	-0.493977
6	-0.26409	-0.266275	-0.266496	-0.182753	-0.261579	-0.266504	-0.266504	-0.262276	-0.265928	-0.265271	-0.256781	-0.256509	3.61397	-0.266503	-0.266504
7	-0.370532	-0.371177	-0.371335	-0.36993	-0.369508	-0.371412	-0.371412	2.99192	-0.371363	-0.370218	-0.35451	-0.367647	1.80961	-0.371412	-0.371078
8	0.19761	-0.396403	-0.572566	-0.310259	-0.326777	-0.609876	-0.609875	-0.406489	-0.607124	3.08246	0.627137	-0.0126851	1.1646	-0.609876	-0.609876
9	-0.159046	-0.3718	-0.389798	0.246805	0.17505	-0.414777	-0.414777	-0.144778	-0.41453	-0.150611	3.53068	-0.286921	-0.375941	-0.414777	-0.414777
10	-0.264324	-0.26478	-0.268536	-0.253601	-0.26579	-0.268547	-0.268547	-0.250426	-0.268526	-0.252567	3.61426	-0.249083	-0.202434	-0.268547	-0.268547
Mean	-0.221898	-0.352186	-0.430618	0.0104013	-0.236578	-0.438238	-0.438238	0.20065	-0.437006	0.298569	1.41987	-0.236984	1.73869	-0.438236	-0.438205
SD	0.161096	0.141223	0.183698	0.447502	0.198267	0.187961	0.187961	1.02687	0.187425	1.12398	1.68097	0.146861	1.60097	0.187959	0.187974
SE	0.0509431	0.0446587	0.0580905	0.141513	0.0626976	0.0594385	0.0594385	0.324725	0.059269	0.355433	0.531569	0.0464417	0.506272	0.0594379	0.0594427
Group 1	Group 2	p-Value
d4	a2	0.0429
d4	d3	0.0429
d5	a2	0.0545
d5	d3	0.0545
d4	a1	0.0859
d1	a2	0.1064
d5	a1	0.1306
k3	d3	0.1588
k3	d6	0.1588
k3	K1D	0.1588
k3	k2	0.1588
k3	a2	0.1912
K2D	d3	0.2693
K2D	d6	0.2693
K2D	k2	0.2693
d1	a1	0.3148
d4	d2	0.3148
d5	d2	0.3148
K2D	a2	0.3148
K2D	K1D	0.3148
k1	a2	0.3642
k1	d3	0.3642
k1	d6	0.3642
k4	a2	0.4169
k4	d3	0.4169
k4	d6	0.4169
k4	K1D	0.4169
k4	k2	0.4169
k3	a1	0.5289
d2	a2	0.6977
d5	d1	0.7969
K2D	a1	0.7969
k1	a1	0.8395
k4	a1	0.8395
d4	d1	0.8766
d2	a1	0.9876
k3	d2	0.9876
k3	k1	0.9996
K2D	d2	0.9999
K2D	k1	1
k4	d2	1
k1	d2	1
K1D	d3	1
K1D	d6	1
k4	k1	1
d5	d4	1
k3	K2D	1
d6	d3	1
k5	d6	1
k2	d6	1
K1D	a2	1
k5	d3	1
k5	k2	1
k2	d3	1
k3	d1	1
d6	a2	1
d3	a2	1
k2	a2	1
k2	K1D	1
K2D	d1	1
k5	a2	1
k5	K1D	1
k4	K2D	1
k4	k3	0.9999
a2	a1	0.9979
d6	a1	0.9979
K1D	a1	0.9979
d3	a1	0.996
k2	a1	0.996
k5	a1	0.996
k4	d1	0.9928
k1	d1	0.9799
d2	d1	0.9078
K2D	d4	0.8766
k3	d4	0.8766
K2D	d5	0.7969
k3	d5	0.7969
d3	d2	0.6977
d6	d2	0.6977
K1D	d2	0.6977
k2	d2	0.6977
k5	d2	0.6977
k1	d5	0.4721
k4	d5	0.4721
k1	d4	0.4169
k4	d4	0.4169
k5	k4	0.4169
K1D	k1	0.3642
k2	k1	0.3642
k5	k1	0.3642
k5	K2D	0.2693
k5	k3	0.1588
d3	d1	0.1064
d6	d1	0.1064
K1D	d1	0.1064
k2	d1	0.1064
k5	d1	0.1064
d6	d5	0.0545
K1D	d5	0.0545
k2	d5	0.0545
k5	d5	0.0545
d6	d4	0.0429
K1D	d4	0.0429
k2	d4	0.0429
k5	d4	0.0429
	Model outcome: S2C
	Parameter
Replicate	k1	a1	a2	d1	d2	k2	d3	k3	K1D	K2D	d4	k4	d5	k5	k6
1	0.143785	-0.726261	-0.797676	0.268993	0.162228	-0.736876	0.273919	-0.238586	-0.81969	1.14263	0.104223	-0.819356	-0.820099	2.94993	-0.0871664
2	-0.263727	-0.269925	-0.271564	-0.131506	-0.26101	3.61252	-0.271574	-0.268439	-0.272047	-0.271868	-0.257222	-0.272046	-0.271968	-0.262757	-0.266866
3	-0.279792	-0.254108	-0.280102	-0.247906	-0.251529	-0.084603	-0.274199	-0.276672	-0.280664	-0.275834	3.61039	-0.280667	-0.280654	-0.273122	-0.270536
4	-0.412875	-0.411827	-0.415107	2.15218	2.71498	-0.413336	-0.382304	-0.374768	-0.41516	-0.414839	0.0248161	-0.415163	-0.415166	-0.413199	-0.408232
5	-0.253336	-0.258655	-0.258741	-0.258432	3.61478	-0.258478	-0.258432	-0.258448	-0.258725	-0.258615	-0.258424	-0.258737	-0.258741	-0.258614	-0.258402
6	-0.258217	-0.258211	-0.258212	3.61478	-0.257983	-0.258217	-0.258215	-0.258215	-0.258218	-0.258216	-0.258217	-0.258218	-0.258218	-0.25821	-0.258216
7	-0.276247	-0.275972	-0.27602	-0.274136	-0.274351	-0.276217	-0.276191	3.60695	-0.276335	-0.276294	-0.275689	-0.276348	-0.276357	-0.276333	-0.0204639
8	0.344983	-0.627878	-0.646609	-0.027409	0.792199	-0.365658	0.217036	-0.576011	-0.681539	3.13408	-0.101729	-0.681526	-0.681388	-0.639534	0.540985
9	-0.335895	-0.325016	-0.336388	-0.3195	-0.318063	-0.245446	3.47261	-0.329564	-0.337024	-0.336504	-0.328914	-0.337024	-0.337024	-0.336022	0.749769
10	-0.286614	-0.333251	-0.525085	-0.33653	-0.365436	-0.425723	-0.321101	-0.445807	-0.526476	-0.525537	2.99402	-0.526476	-0.526476	0.618618	1.53187
Mean	-0.187794	-0.37411	-0.40655	0.444054	0.555582	0.0547964	0.192155	0.0580445	-0.412588	0.1659	0.525325	-0.412556	-0.412609	0.0850763	0.125275
SD	0.237455	0.16851	0.189957	1.34312	1.43422	1.26167	1.17473	1.25144	0.199994	1.14379	1.47742	0.199914	0.200068	1.05718	0.623346
SE	0.0750899	0.0532874	0.0600697	0.424733	0.45354	0.398974	0.371482	0.395742	0.0632436	0.361697	0.467202	0.0632184	0.063267	0.334309	0.197119
Group 1	Group 2	p-Value
d4	a2	0.1588
d6	d5	0.1912
d6	a2	0.2281
d1	a2	0.3642
d4	a1	0.3642
d2	a2	0.4169
d1	a1	0.5289
d6	a1	0.5289
d2	a1	0.643
d3	a2	0.7969
k1	d5	0.8766
k1	a2	0.9334
K2D	d5	0.9334
K2D	K1D	0.9334
k5	d5	0.9535
k5	K1D	0.9535
k5	k4	0.9535
d3	a1	0.9688
k5	a2	0.9688
k2	d5	0.9928
k2	K1D	0.9928
K2D	a2	0.9928
k3	d5	0.996
k3	K1D	0.996
k2	a2	0.9979
k3	a2	0.9979
k1	a1	0.999
d4	d3	0.9998
d6	d3	0.9998
k5	a1	1
K2D	a1	1
k3	a1	1
k2	a1	1
d4	d1	1
k5	k3	1
d4	d2	1
k5	k2	1
d6	d1	1
K2D	k2	1
k5	K2D	1
K1D	d5	1
k4	d5	1
k4	K1D	1
k5	k1	1
d2	d1	1
d6	d2	1
K2D	k1	1
k3	k2	1
k3	K2D	1
d6	d4	1
d5	a2	1
K1D	a2	1
k4	a2	1
k2	k1	1
k3	k1	1
k5	d3	1
k1	d3	1
d3	d1	1
d3	d2	1
a2	a1	1
d5	a1	1
K1D	a1	1
K2D	d3	1
k4	a1	1
k2	d3	0.9999
k3	d3	0.9998
k1	d1	0.996
K2D	d2	0.996
k4	k3	0.996
k5	d1	0.996
k5	d2	0.996
k1	d2	0.9928
K2D	d1	0.9928
k4	k2	0.9928
k5	d6	0.9928
k2	d2	0.9876
K2D	d6	0.9876
k1	d6	0.9799
k2	d6	0.9799
k1	d4	0.9688
k2	d1	0.9688
k3	d2	0.9688
k3	d6	0.9535
k2	d4	0.9334
K2D	d4	0.9334
k3	d1	0.9334
k4	K2D	0.9334
k5	d4	0.9334
K1D	k1	0.8766
k4	k1	0.8766
k3	d4	0.7969
d5	d3	0.643
K1D	d3	0.643
k4	d3	0.643
d5	d2	0.4169
K1D	d2	0.4169
k4	d2	0.4169
d5	d1	0.3148
K1D	d1	0.3148
k4	d1	0.3148
K1D	d6	0.1912
k4	d6	0.1912
d5	d4	0.1306
K1D	d4	0.1306
k4	d4	0.1306
