# Supplementary material for: Tracking transcription factor mobility and interaction in Arabidopsis roots with fluorescence correlation spectroscopy
Source: eLife journal article supplement (doi:10.7554/elife.14770), 2016-06-11
Supplement: supp [file elife-14770-supp-v1.zip › elife_poa_e14770_Figure_5_source_data_2.xlsx]

## Sheet: Fig 5 SD 2 - Area
Image	Cell	Area (μm2)
SHRSHRGFP_pCF_ref_1	Vasc	18.938
SHRSHRGFP_pCF_ref_2	Vasc	21.986
SHRSHRGFP_pCF_ref_3	Vasc	27.766
SHRSHRGFP_pCF_ref_4	Vasc	15.16
SHRSHRGFP_pCF_ref_5	Vasc	31.703
SHRSHRGFP_pCF_ref_6	Vasc	34.431
SHRSHRGFP_pCF_ref_7	Vasc	37.845
SHRSHRGFP_pCF_ref_8	Vasc	20.553
SHRSHRGFP_pCF_ref_9	Vasc	39.132
SHRSHRGFP_pCF_ref_10	Vasc	33.365
SHRSHRGFP_pCF_ref_11	Vasc	42.593
SHRSHRGFP_pCF_ref_12	Vasc	33.693
SHRSHRGFP_pCF_ref_13	Vasc	34.253
SHRSHRGFP_pCF_ref_15	Vasc	33.989
SHRSHRGFP_pCF_ref_16	Vasc	21.845
SHRSHRGFP_pCF_ref_17	Vasc	59.356
SHRSHRGFP_pCF_ref_18	Vasc	33.343
SHRSHRGFP_pCF_ref_19	Vasc	25.476
SHRSHRGFP_pCF_ref_20	Vasc	35.592
	Mean:	31.6326
	SD:	10.3187
	SE:	2.36726
Image	Cell	Area (μm2)
pSHRSHRGFP-Root1-Peri to Endo-ref	Endo	35.539
pSHRSHRGFP-Root1-Peri-Endo-Cortex-ref	Endo	29.322
pSHRSHRGFP-Root1-Vasc to Peri to Endo-ref	Endo	39.883
pSHRSHRGFP-Root2-Peri to Endo-ref	Endo	32.068
pSHRSHRGFP-Root2-PeriC to EndoC to CortexC-ref	Endo	44.374
pSHRSHRGFP-Root3-Endo to Peri to Vasc-ref	Endo	47.006
pSHRSHRGFP-Root3-Vasc to Peri to Endo-ref	Endo	36.983
root1_pCF_vasc_endo_ref	Endo	21.862
root3_pCF_vasc_endo_ref	Endo	37.617
root4_pCF_vasc_endoB.ref	Endo	26.035
SHR_Root1_3-vasc-EndoA.ref	Endo	44.687
SHR_Root2_vas_vasc.ref	Endo	33.365
SHRGFP_Root1_Vasc-Endo.ref	Endo	38.271
SHRGFP_Root1_Vasc-EndoA.ref	Endo	31.459
SHRGFP_Root2_Vasc-EndoA.ref	Endo	33.308
SHRSHRGFP in shr2-Root1-Peri to Endo-ref	Endo	49.509
SHRSHRGFP_Root1_vasc-peri-endo-cortex_ref	Endo	39.186
SHRSHRGFP-Root1-endo to peri-ref	Endo	30.655
SHRSHRGFP-Root1-Peri to Endo-ref	Endo	34.346
	Mean:	36.0776
	SD:	7.29814
	SE:	1.67431
