# Supplementary material for: Tracking transcription factor mobility and interaction in Arabidopsis roots with fluorescence correlation spectroscopy
Source: eLife journal article supplement (doi:10.7554/elife.14770), 2016-06-11
Supplement: supp [file elife-14770-supp-v1.zip › elife_poa_e14770_Supplementary_File_1.xlsx]

## Sheet: Supplementary File 1- GoF
Sample	Source Data	p-value
35S Diffusion	Figure 1-Source Data 1	0.7374
SHR Endo Diffusion	Figure 1-Source Data 2	0.9336
SHR in SCRi Diffusion	Figure 1-Source Data 3	0.0097
SHR QC Diffusion	Figure 1-Source Data 2	0.8387
SHR Vasc Diffusion	Figure 1-Source Data 2	<0.0001
SHR Endo Dimer	Figure 3-Source Data 1	0.404
SHR in SCRi Dimer	Figure 3-Source Data 2	0.1978
SHR Vasc Dimer	Figure 3-Source Data 1	<0.0001
