# Supplementary material for: Tracking transcription factor mobility and interaction in Arabidopsis roots with fluorescence correlation spectroscopy
Source: eLife journal article supplement (doi:10.7554/elife.14770), 2016-06-11
Supplement: supp [file elife-14770-supp-v1.zip › elife_poa_e14770_Supplementary_File_2.xlsx]

## Sheet: Supplementary File 2- PSF
Supplementary File 2. PSF beam waist values. SEM is given.
Instrument and objective	PSF beam waist (μm)
Zeiss 780, 40 x 1.2 NA water	0.240 ± 0.008 (n=10)
Zeiss 710, 40 x 1.1 NA water	0.241 ± 0.028 (n=7)
Zeiss 710, 63 x 1.1 NA water	0.336 ± 0.011 (n=8)
