# Supplementary material for: Tracking transcription factor mobility and interaction in Arabidopsis roots with fluorescence correlation spectroscopy
Source: eLife journal article supplement (doi:10.7554/elife.14770), 2016-06-11
Supplement: supp [file elife-14770-supp-v1.zip › elife_poa_e14770_Supplementary_File_3.pdf]

**Supplemental File 3.** Equations, initial conditions, and parameter values used for simulations.

SHR-SCR Model in wild type conditions

$$\begin{aligned}
\frac{dS_v}{dt} &= k_1 - a_1 S_v + a_2 S_e - d_1 S_v \\
\frac{dS_e}{dt} &= a_1 S_v - d_2 S_e \\
\frac{dS_{2e}}{dt} &= k_2(C) S_e^2 - d_3 S_{2e} \\
\frac{dC}{dt} &= k_3 \left( \frac{K_{1D}^2 C + K_{1D} S C + S_2 C}{K_{1D}^2 K_{2D} + K_{1D} K_{2D} S_e + K_{1D}^2 C + K_{2D} S_e + K_{1D} S C + S_2 C} \right) - d_4 C \\
\frac{dSC}{dt} &= k_4 S_e C - d_5 SC \\
\frac{dS_2 C}{dt} &= k_5 S_{2e} C - d_6 S_2 C
\end{aligned}$$

$$[S_v(0), S_e(0), S_{2e}(0), C(0), SC(0), S_2 C(0)] = (0.1, 0, 0, 0.1, 0, 0)$$

where  $a_1 = \frac{D_1}{A_1}$ ,  $a_2 = 0$ , and  $k_2(C) = \frac{L}{1 + e^{-k(C-C_0)}}$ .

SHR-SCR Model in SCRi line

$$\begin{aligned}
\frac{dS_v}{dt} &= k_1 - a_1 S_v + a_2 S_e - d_1 S_v \\
\frac{dS_e}{dt} &= a_1 S_v - a_2 S_e - d_2 S_e \\
\frac{dS_{2e}}{dt} &= k_2(C) S_e^2 - d_3 S_{2e} \\
\frac{dC}{dt} &= 0 \\
\frac{dSC}{dt} &= k_4 S_e C - d_5 SC \\
\frac{dS_2 C}{dt} &= k_5 S_{2e} C - d_6 S_2 C
\end{aligned}$$

$$[S_v(0), S_e(0), S_{2e}(0), C(0), SC(0), S_2 C(0)] = (0.1, 0, 0, 300, 0, 0)$$

where  $a_1 = \frac{D_1}{A_1}$ ,  $a_2 = \frac{D_2}{A_2}$ , and  $k_2(C) = \frac{L}{1 + e^{-k(C-C_0)}}$ .

| Parameter | Biological meaning (units)                                              | Initial Value | Estimated Value | Reference                 |
|-----------|-------------------------------------------------------------------------|---------------|-----------------|---------------------------|
| $k_1$     | Production of SHR in vasculature (Conc/hr)                              | 300           |                 | Cruz-Ramirez et al, 2012  |
| $D_1$     | DC of SHR from vasculature to endodermis ( $\mu\text{m}^2/\text{sec}$ ) | 2.11          |                 | Experimentally determined |
| $A_1$     | Area of vasculature cell ( $\mu\text{m}^2$ )                            | 31.63         |                 | Experimentally determined |
| $D_2$     | DC of SHR from endodermis to vasculature ( $\mu\text{m}^2/\text{sec}$ ) | 2.08          |                 | Experimentally determined |
| $A_2$     | Area of endodermis cell ( $\mu\text{m}^2$ )                             | 36.08         |                 | Experimentally determined |
| $d_1$     | Degradation of SHR monomer in vasculature (1/hr)                        | 1             |                 | Cruz-Ramirez et al, 2012  |
| $d_2$     | Degradation of SHR monomer in endodermis (1/hr)                         | 1             | 1000            | Estimated                 |
| $L$       | Maximum value of $k_2$ (1/hr)                                           | 300           | 0.5             | Estimated                 |
| $k$       | Steepness of $k_2$ curve (1/Conc.)                                      |               | 0.1             | Estimated                 |
| $C_0$     | Midpoint of $k_2$ curve (Conc.)                                         |               | 360             | Estimated                 |
| $d_3$     | Degradation of SHR homodimer in endodermis (1/hr)                       | 1             |                 | Cruz-Ramirez et al, 2012  |
| $k_3$     | Production of SCR (1/hr)                                                | 1100          |                 | Cruz-Ramirez et al, 2012  |
| $K_{1D}$  | Dissociation constant for SHR (Conc.)                                   | 1000          |                 | Cruz-Ramirez et al, 2012  |
| $K_{2D}$  | Dissociation constant for SCR (Conc.)                                   | 1000          | 500             | Estimated                 |
| $d_4$     | Degradation of SCR (1/hr)                                               | 1             |                 | Cruz-Ramirez et al, 2012  |
| $k_4$     | Formation of 1:1 SHR-SCR complex (1/hr)                                 | 5             |                 | Cruz-Ramirez et al, 2012  |
| $d_5$     | Degradation of 1:1 SHR-SCR complex (1/hr)                               | 1             |                 | Cruz-Ramirez et al, 2012  |
| $k_5$     | Formation of 2:1 SHR-SCR complex (1/hr)                                 | 5             |                 | Based on $k_4$            |
| $d_6$     | Degradation of 2:1 SHR-SCR complex (1/hr)                               | 1             |                 | Based on $d_5$            |

Parameter values. Note that all diffusion coefficients were converted to hours for estimation and simulation. Some parameters were estimated using experimental data: for the rest, the initial values were used in simulations. DC: diffusion coefficient
