# Supplementary material for: Tracking transcription factor mobility and interaction in Arabidopsis roots with fluorescence correlation spectroscopy
Source: eLife journal article supplement (doi:10.7554/elife.14770), 2016-06-11
Supplement: supp [file elife-14770-supp-v1.zip › elife_poa_e14770_Supplementary_File_3.tex]

\documentclass[12 pt]{amsart}

\usepackage{amsmath}
\usepackage{amssymb}
\usepackage{fullpage}
\usepackage{graphicx}
\usepackage{subfigure}
\usepackage{bm}
\usepackage{pdfpages}
\usepackage{epstopdf}
\usepackage{float}
\usepackage[margin=0cm]{caption}
\usepackage{enumerate}
\usepackage{csvsimple}
\usepackage{booktabs}
\parindent 0 pt

\begin{document}

\textbf{Supplemental File 3.} Equations, initial conditions, and parameter values used for simulations.\\

SHR-SCR Model in wild type conditions\\

\begin{align*}
\frac{dS_v}{dt} &= k_1-a_1S_v+a_2S_e-d_1S_v\\
\frac{dS_e}{dt} &= a_1S_v-d_2S_e\\
\frac{dS_{2e}}{dt} &= k_2(C)S_e^2-d_3S_{2e}\\
\frac{dC}{dt} &= k_3\left(\frac{K_{1D}^2C+K_{1D}SC+S_2C}{K_{1D}^2K_{2D}+K_{1D}K_{2D}S_e+K_{1D}^2C+K_{2D}S_e+K_{1D}SC+S_2C}\right)-d_4C\\
\frac{dSC}{dt} &= k_4S_eC-d_5SC\\
\frac{dS_2C}{dt} &= k_5S_{2e}C-d_6S_2C\\
[S_v(0),S_e(0),S_{2e}(0),&C(0),SC(0),S_2C(0)] = (0.1,0,0,0.1,0,0)\\
\end{align*}

where $a_1=\displaystyle\frac{D_1}{A_1}$, $a_2=0$, and $k_2(C) = \displaystyle\frac{L}{1+e^{-k(C-C_0)}}$.\\

SHR-SCR Model in SCRi line\\

\begin{align*}
\frac{dS_v}{dt} &= k_1-a_1S_v+a_2S_e-d_1S_v\\
\frac{dS_e}{dt} &= a_1S_v-a_2S_e-d_2S_e\\
\frac{dS_{2e}}{dt} &= k_2(C)S_e^2-d_3S_{2e}\\
\frac{dC}{dt} &= 0\\
\frac{dSC}{dt} &= k_4S_eC-d_5SC\\
\frac{dS_2C}{dt} &= k_5S_{2e}C-d_6S_2C\\
[S_v(0),S_e(0),S_{2e}(0),&C(0),SC(0),S_2C(0)] = (0.1,0,0,300,0,0)\\
\end{align*}

where $a_1=\displaystyle\frac{D_1}{A_1}$, $a_2=\displaystyle\frac{D_2}{A_2}$, and $k_2(C) = \displaystyle\frac{L}{1+e^{-k(C-C_0)}}$.\\\\\\\\
Parameter values. Note that all diffusion coefficients were converted to hours for estimation and simulation. Some parameters were estimated using experimental data: for the rest, the initial values were used in simulations. DC: diffusion coefficient

\tiny
\begin{table}
\begin{tabular}{l | l | c | c | c}
Parameter & Biological meaning (units) & Initial Value & Estimated Value & Reference\\
\hline
$k_1$ & Production of SHR in vasculature (Conc/hr) & 300 & & Cruz-Ramirez et al, 2012\\
$D_1$ & DC of SHR from vasculature to endodermis ($\mu$m$^2$/sec) & 2.11 &  & Experimentally determined\\
$A_1$ & Area of vasculature cell ($\mu$m$^2$) & 31.63 &  & Experimentally determined\\
$D_2$ & DC of SHR from endodermis to vasculature ($\mu$m$^2$/sec) & 2.08 &  & Experimentally determined\\
$A_2$ & Area of endodermis cell ($\mu$m$^2$) & 36.08 &  & Experimentally determined\\
$d_1$ & Degradation of SHR monomer in vasculature (1/hr) & 1 &  & Cruz-Ramirez et al, 2012\\
$d_2$ & Degradation of SHR monomer in endodermis (1/hr) & 1 & 1000 & Estimated\\
$L$ & Maximum value of $k_2$ (1/hr) & 300 & 0.5 & Estimated\\
$k$ & Steepness of $k_2$ curve (1/Conc.) &  & 0.1 & Estimated\\
$C_0$ & Midpoint of $k_2$ curve (Conc.) &  & 360 & Estimated\\
$d_3$ & Degradation of SHR homodimer in endodermis (1/hr) & 1 &  & Cruz-Ramirez et al, 2012\\
$k_3$ & Production of SCR (1/hr) & 1100 & & Cruz-Ramirez et al, 2012\\
$K_{1D}$ & Dissociation constant for SHR (Conc.) & 1000 &  & Cruz-Ramirez et al, 2012\\
$K_{2D}$ & Dissociation constant for SCR (Conc.) & 1000 & 500 & Estimated\\
$d_4$ & Degradation of SCR (1/hr) & 1 &  & Cruz-Ramirez et al, 2012\\
$k_4$ & Formation of 1:1 SHR-SCR complex (1/hr) & 5 &  & Cruz-Ramirez et al, 2012\\
$d_5$ & Degradation of 1:1 SHR-SCR complex (1/hr) & 1 & & Cruz-Ramirez et al, 2012\\
$k_5$ & Formation of 2:1 SHR-SCR complex (1/hr) & 5 &  & Based on $k_4$\\
$d_6$ & Degradation of 2:1 SHR-SCR complex (1/hr) & 1 &  & Based on $d_5$
\end{tabular}
\end{table}

\end{document}
