# Supplementary material for: Tracking transcription factor mobility and interaction in Arabidopsis roots with fluorescence correlation spectroscopy
Source: eLife journal article supplement (doi:10.7554/elife.14770), 2016-06-11
Supplement: supp [file elife-14770-supp-v1.zip › elife_poa_e14770_Table_2_source_data_1.xlsx]

## Sheet: Table 2 SD 1- 35S Monomer NB
Filename	Instrument	Location	Pixel Size (μm)	Cursor Size	Monomeric GFP Brightness
35SGFP_780_1	Zeiss 780	NA	0.05	45	0.33
35SGFP_780_2	Zeiss 780	Endodermis	0.05	40	0.3
35SGFP_780_3	Zeiss 780	Vasculature	0.05	40	0.28
35SGFP_780_4	Zeiss 780	SCN	0.05	40	0.18
35SGFP_780_5	Zeiss 780	NA	0.1	40	0.23
35SGFP_780_6	Zeiss 780	Vasculature	0.1	45	0.25
35SGFP_780_7	Zeiss 780	Vasculature	0.1	45	0.28
35SGFP_780_8	Zeiss 780	Vasculature	0.1	40	0.3
35SGFP_780_9	Zeiss 780	Vasculature	0.1	45	0.28
35SGFP_780_10	Zeiss 780	Vasculature	0.05	45	0.33
35SGFP_780_11	Zeiss 780	Vasculature	0.05	40	0.28
35SGFP_780_12	Zeiss 780	Vasculature	0.1	40	0.33
35SGFP_780_13	Zeiss 780	Vasculature	0.05	40	0.25
35SGFP_780_14	Zeiss 780	Vasculature	0.05	40	0.25
			Average:	41.7857	0.276429
			SD:	2.48623	0.0423551
			SE:	0.664472	0.0113199
Filename	Instrument	Location	Pixel Size (μm)	Cursor Size	Monomeric GFP Brightness
35SGFP_710_1	Zeiss 710	Vasculature	0.05	50	0.28
35SGFP_710_2	Zeiss 710	SCN	0.1	50	0.19
35SGFP_710_3	Zeiss 710	SCN	0.1	50	0.19
35SGFP_710_4	Zeiss 710	SCN	0.1	50	0.26
35SGFP_710_5	Zeiss 710	SCN	0.1	50	0.26
35SGFP_710_6	Zeiss 710	SCN	0.1	50	0.23
35SGFP_710_7	Zeiss 710	SCN	0.1	50	0.26
35SGFP_710_8	Zeiss 710	SCN	0.1	50	0.27
35SGFP_710_9	Zeiss 710	SCN	0.1	50	0.26
35SGFP_710_10	Zeiss 710	SCN	0.1	50	0.26
35SGFP_710_11	Zeiss 710	SCN	0.1	50	0.25
35SGFP_710_12	Zeiss 710	SCN	0.1	50	0.19
35SGFP_710_13	Zeiss 710	SCN	0.1	50	0.24
35SGFP_710_14	Zeiss 710	SCN	0.1	50	0.29
35SGFP_710_15	Zeiss 710	SCN	0.1	50	0.21
35SGFP_710_16	Zeiss 710	SCN	0.1	50	0.2
35SGFP_710_17	Zeiss 710	SCN	0.1	50	0.23
35SGFP_710_18	Zeiss 710	SCN	0.1	50	0.21
35SGFP_710_19	Zeiss 710	Vasculature	0.1	50	0.24
35SGFP_710_20	Zeiss 710	Vasculature	0.1	50	0.25
			Average:	50	0.2385
			SD:	0	0.0309966
			SE:	0	0.00693105
