# Supplementary material for: Tracking transcription factor mobility and interaction in Arabidopsis roots with fluorescence correlation spectroscopy
Source: eLife journal article supplement (doi:10.7554/elife.14770), 2016-06-11
Supplement: supp [file elife-14770-supp-v1.zip › elife_poa_e14770_Table_2_source_data_2.xlsx]

## Sheet: Table 2 SD 2- 35S Background
Filename	Instrument	Pixel Size (μm)	S-Factor
35SGFP_780_BG_1	Zeiss 780	0.1	1.19
35SGFP_780_BG_2	Zeiss 780	0.1	1.25
35SGFP_780_BG_3	Zeiss 780	0.05	1.37
35SGFP_780_BG_4	Zeiss 780	0.05	1.35
35SGFP_780_BG_5	Zeiss 780	0.1	1.27
35SGFP_780_BG_6	Zeiss 780	0.1	1.35
35SGFP_780_BG_7	Zeiss 780	0.1	1.27
35SGFP_780_BG_8	Zeiss 780	0.1	1.25
35SGFP_780_BG_9	Zeiss 780	0.1	1.25
35SGFP_780_BG_10	Zeiss 780	0.1	1.43
35SGFP_780_BG_11	Zeiss 780	0.1	1.5
35SGFP_780_BG_12	Zeiss 780	0.1	1.35
35SGFP_780_BG_13	Zeiss 780	0.1	1.35
35SGFP_780_BG_14	Zeiss 780	0.05	1.4
35SGFP_780_BG_15	Zeiss 780	0.05	1.45
35SGFP_780_BG_16	Zeiss 780	0.05	1.43
35SGFP_780_BG_17	Zeiss 780	0.1	1.3
		Average:	1.33882
		SD:	0.0855046
		SE:	0.0207379
Filename	Instrument	Pixel Size (μm)	S-Factor
35SGFP_710_BG_1	Zeiss 710	0.1	0.95
35SGFP_710_BG_2	Zeiss 710	0.1	0.95
35SGFP_710_BG_3	Zeiss 710	0.1	0.95
35SGFP_710_BG_4	Zeiss 710	0.1	0.93
35SGFP_710_BG_5	Zeiss 710	0.1	0.95
35SGFP_710_BG_6	Zeiss 710	0.1	0.92
35SGFP_710_BG_7	Zeiss 710	0.1	0.94
35SGFP_710_BG_8	Zeiss 710	0.1	0.92
35SGFP_710_BG_9	Zeiss 710	0.1	0.9
35SGFP_710_BG_10	Zeiss 710	0.1	0.9
35SGFP_710_BG_11	Zeiss 710	0.1	0.92
35SGFP_710_BG_12	Zeiss 710	0.1	0.9
35SGFP_710_BG_13	Zeiss 710	0.1	0.9
35SGFP_710_BG_14	Zeiss 710	0.1	0.9
35SGFP_710_BG_15	Zeiss 710	0.1	0.9
35SGFP_710_BG_16	Zeiss 710	0.1	0.9
35SGFP_710_BG_17	Zeiss 710	0.1	0.93
35SGFP_710_BG_18	Zeiss 710	0.1	0.93
35SGFP_710_BG_19	Zeiss 710	0.1	0.93
35SGFP_710_BG_20	Zeiss 710	0.05	0.9
		Average:	0.921
		SD:	0.0199737
		SE:	0.00446625
