# Supplementary material for: Tracking transcription factor mobility and interaction in Arabidopsis roots with fluorescence correlation spectroscopy
Source: eLife journal article supplement (doi:10.7554/elife.14770), 2016-06-11
Supplement: supp [file elife-14770-supp-v1.zip › elife_poa_e14770_Table_2_source_data_3.xlsx]

## Sheet: Table 2 SD 3- UBQ10
Filename	Instrument	Line	Pixel Size (μm)	S-Factor
UBQ10_BG_1	Zeiss 780	UBQ10mCherry Background	0.1	1.01
UBQ10_BG_2	Zeiss 780	UBQ10mCherry Background	0.1	1
UBQ10_BG_3	Zeiss 780	UBQ10mCherry Background	0.1	1
UBQ10_BG_4	Zeiss 780	UBQ10mCherry Background	0.1	1
UBQ10_BG_5	Zeiss 780	UBQ10mCherry Background	0.1	1.01
UBQ10_BG_6	Zeiss 780	UBQ10mCherry Background	0.1	0.97
UBQ10_BG_7	Zeiss 780	UBQ10mCherry Background	0.1	0.97
UBQ10_BG_8	Zeiss 780	UBQ10mCherry Background	0.1	1
UBQ10_BG_9	Zeiss 780	UBQ10mCherry Background	0.1	0.97
UBQ10_BG_10	Zeiss 780	UBQ10mCherry Background	0.1	1.03
UBQ10_BG_11	Zeiss 780	UBQ10mCherry Background	0.1	0.97
UBQ10_BG_12	Zeiss 780	UBQ10mCherry Background	0.1	1
UBQ10_BG_13	Zeiss 780	UBQ10mCherry Background	0.1	1
UBQ10_BG_14	Zeiss 780	UBQ10mCherry Background	0.1	1.03
UBQ10_BG_15	Zeiss 780	UBQ10mCherry Background	0.1	0.97
UBQ10_BG_16	Zeiss 780	UBQ10mCherry Background	0.1	0.95
UBQ10_BG_17	Zeiss 780	UBQ10mCherry Background	0.1	0.97
UBQ10_BG_18	Zeiss 780	UBQ10mCherry Background	0.1	1
UBQ10_BG_19	Zeiss 780	UBQ10mCherry Background	0.1	1
UBQ10_BG_20	Zeiss 780	UBQ10mCherry Background	0.1	1.05
UBQ10_BG_21	Zeiss 780	UBQ10mCherry Background	0.1	1.05
UBQ10_BG_22	Zeiss 780	UBQ10mCherry Background	0.1	1.05
UBQ10_BG_23	Zeiss 780	UBQ10mCherry Background	0.1	0.96
UBQ10_BG_24	Zeiss 780	UBQ10mCherry Background	0.1	0.94
			Average:	0.995833
			SD:	0.0310563
			SE:	0.00633934
Filename	Instrument	Line	Pixel Size (μm)	Monomeric mCherry Brightness
UBQ10_1	Zeiss 780	UBQ10mCherry	0.1	0.28
UBQ10_2	Zeiss 780	UBQ10mCherry	0.1	0.42
UBQ10_3	Zeiss 780	UBQ10mCherry	0.1	0.28
UBQ10_4	Zeiss 780	UBQ10mCherry	0.1	0.33
UBQ10_5	Zeiss 780	UBQ10mCherry	0.1	0.37
UBQ10_6	Zeiss 780	UBQ10mCherry	0.1	0.37
UBQ10_7	Zeiss 780	UBQ10mCherry	0.1	0.3
			Average:	0.335714
			SD:	0.0531843
			SE:	0.0201018
