# Supplementary figures and images for: Tracking transcription factor mobility and interaction in Arabidopsis roots with fluorescence correlation spectroscopy
Source: eLife journal article supplement (doi:10.7554/elife.14770), 2016-06-11

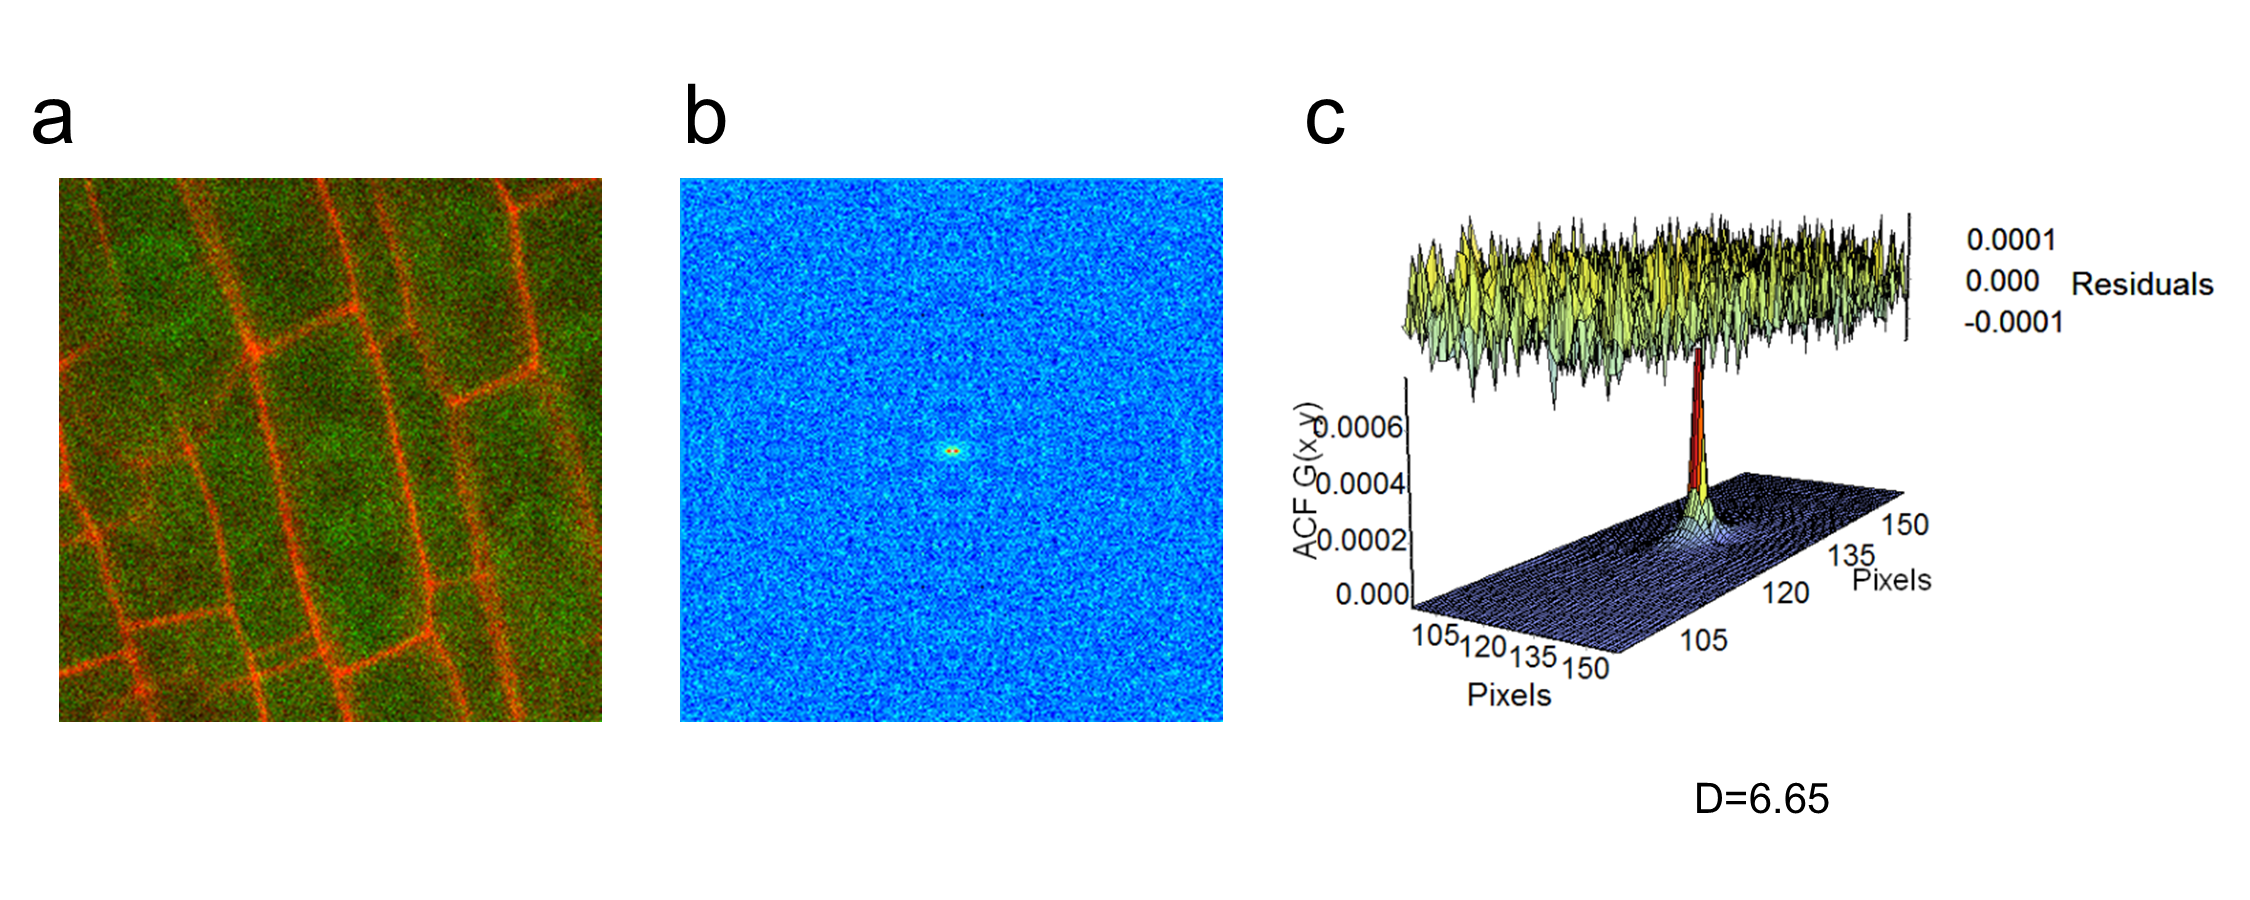

Supplement: supp [file elife-14770-supp-v1.zip › elife_poa_e14770_Figure_1_figure_supplement_1.tif]

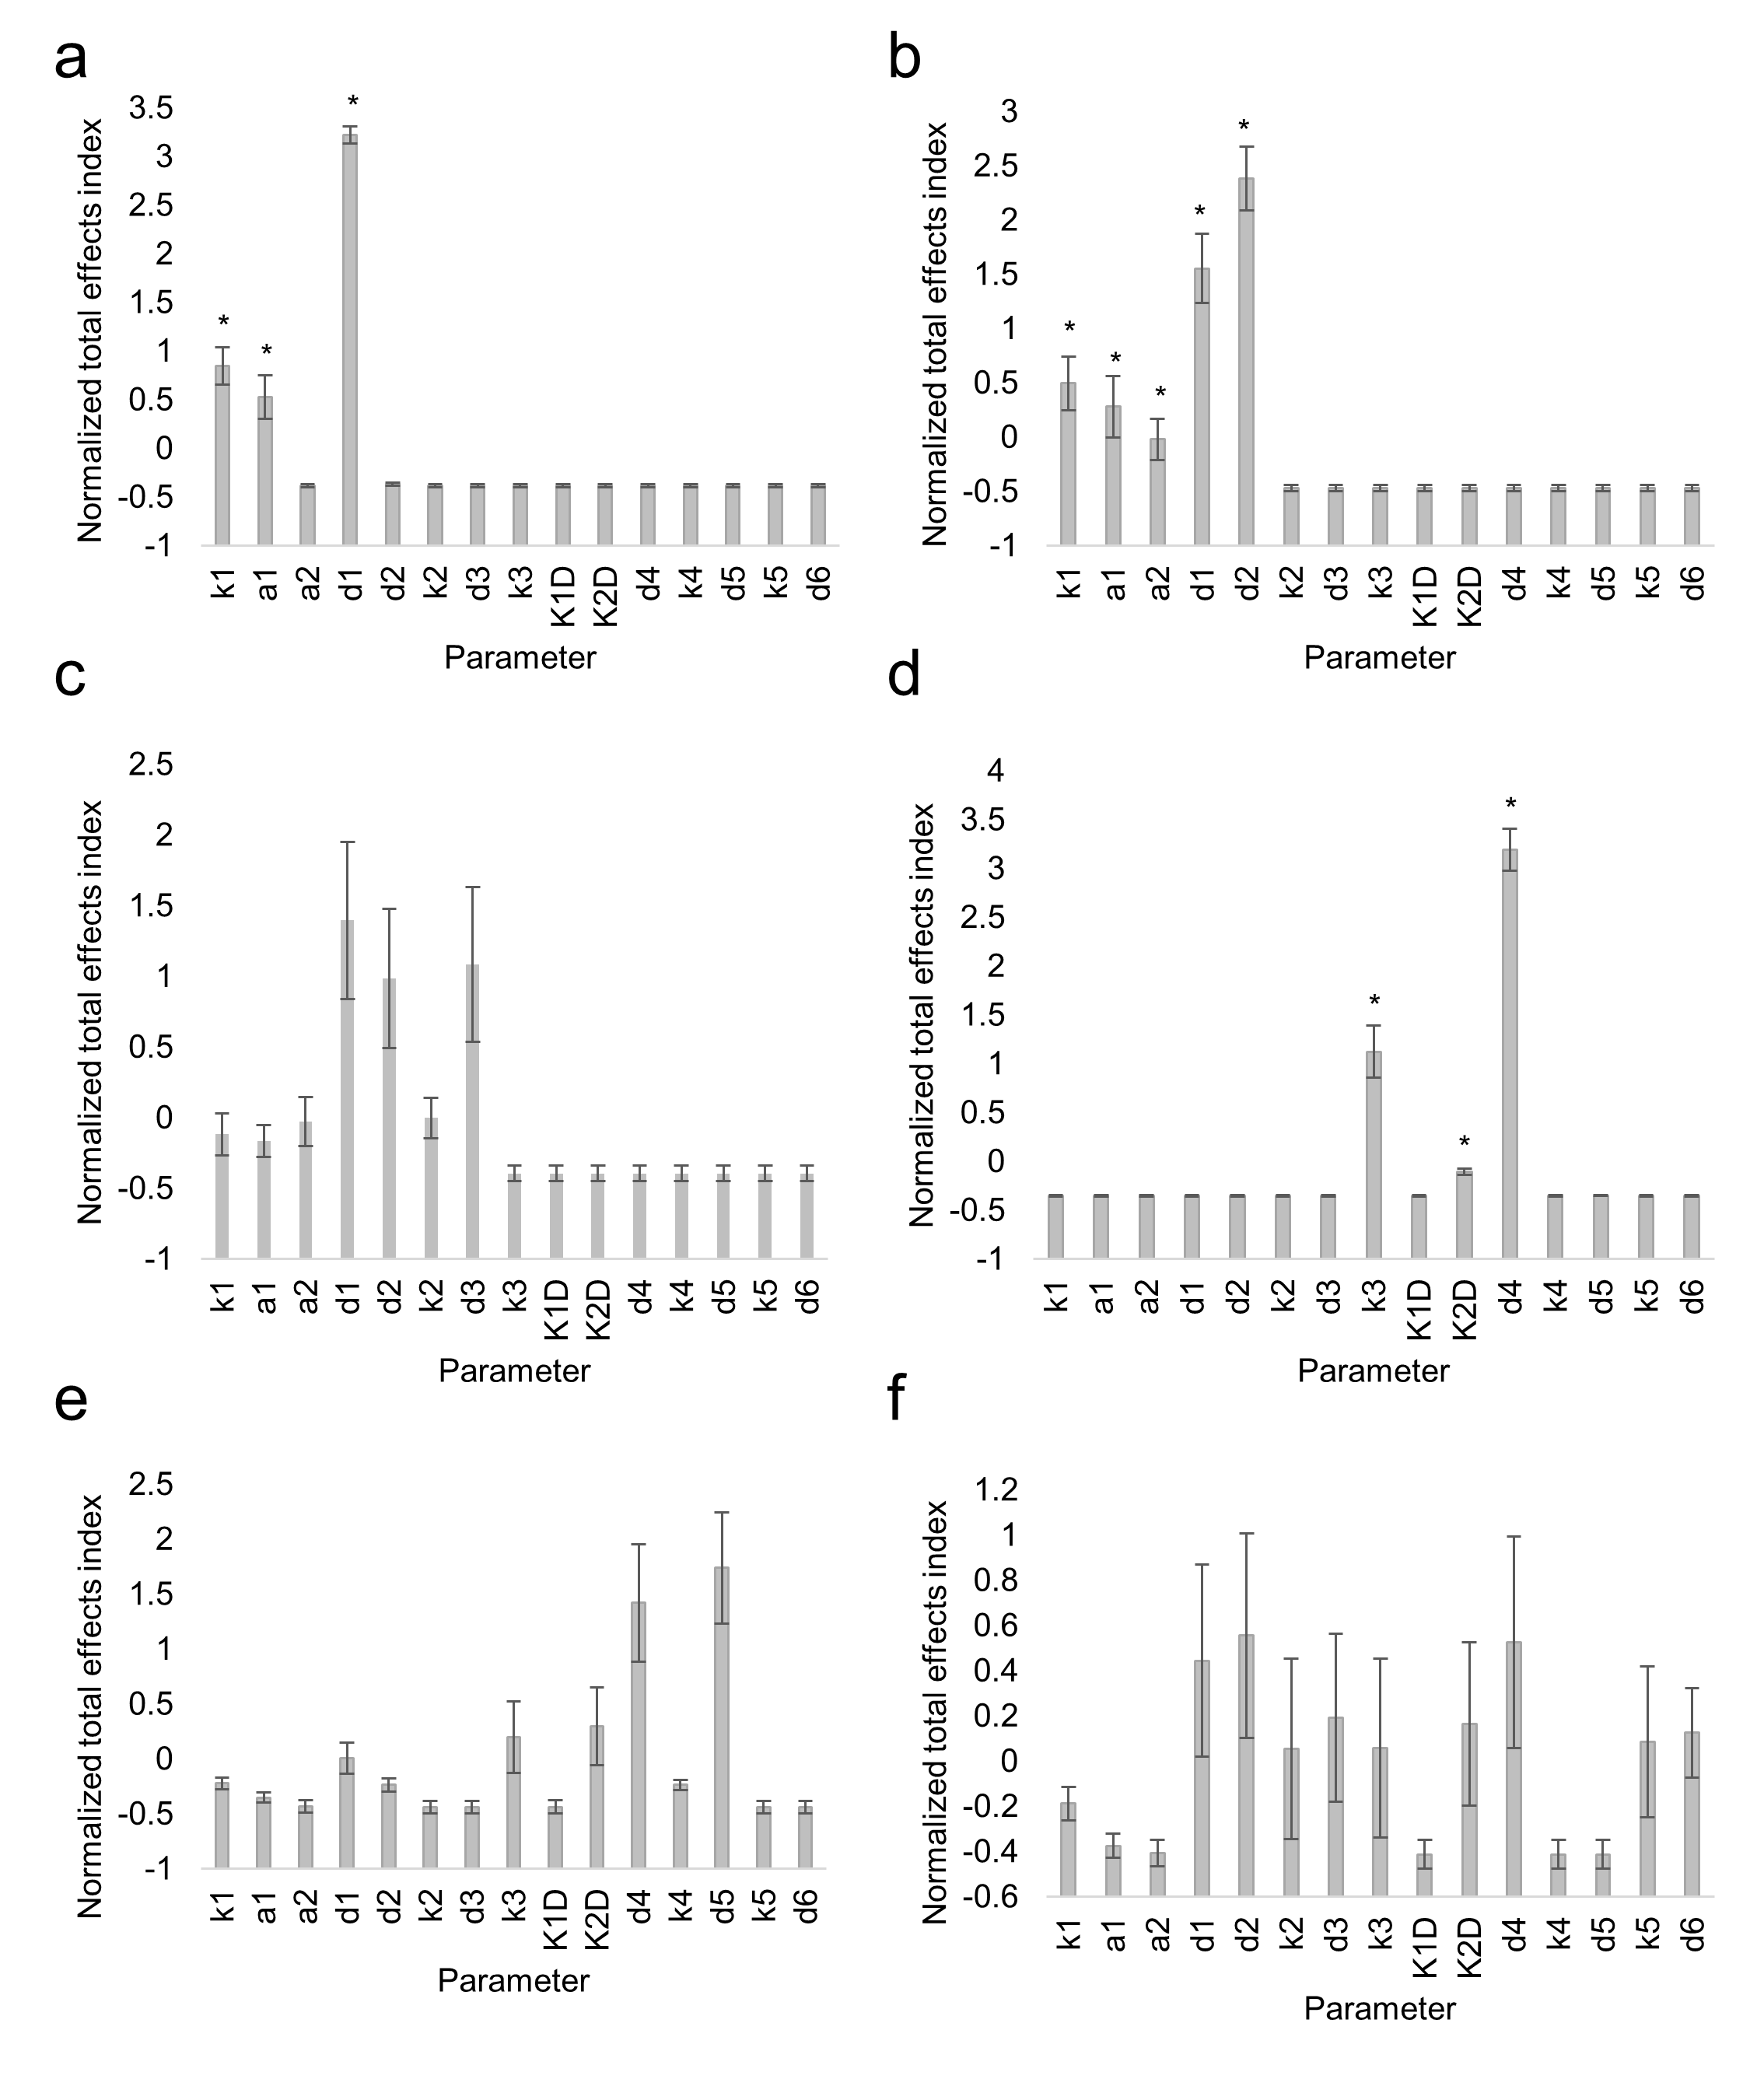

Supplement: supp [file elife-14770-supp-v1.zip › elife_poa_e14770_Figure_5_figure_supplement_1.tif]

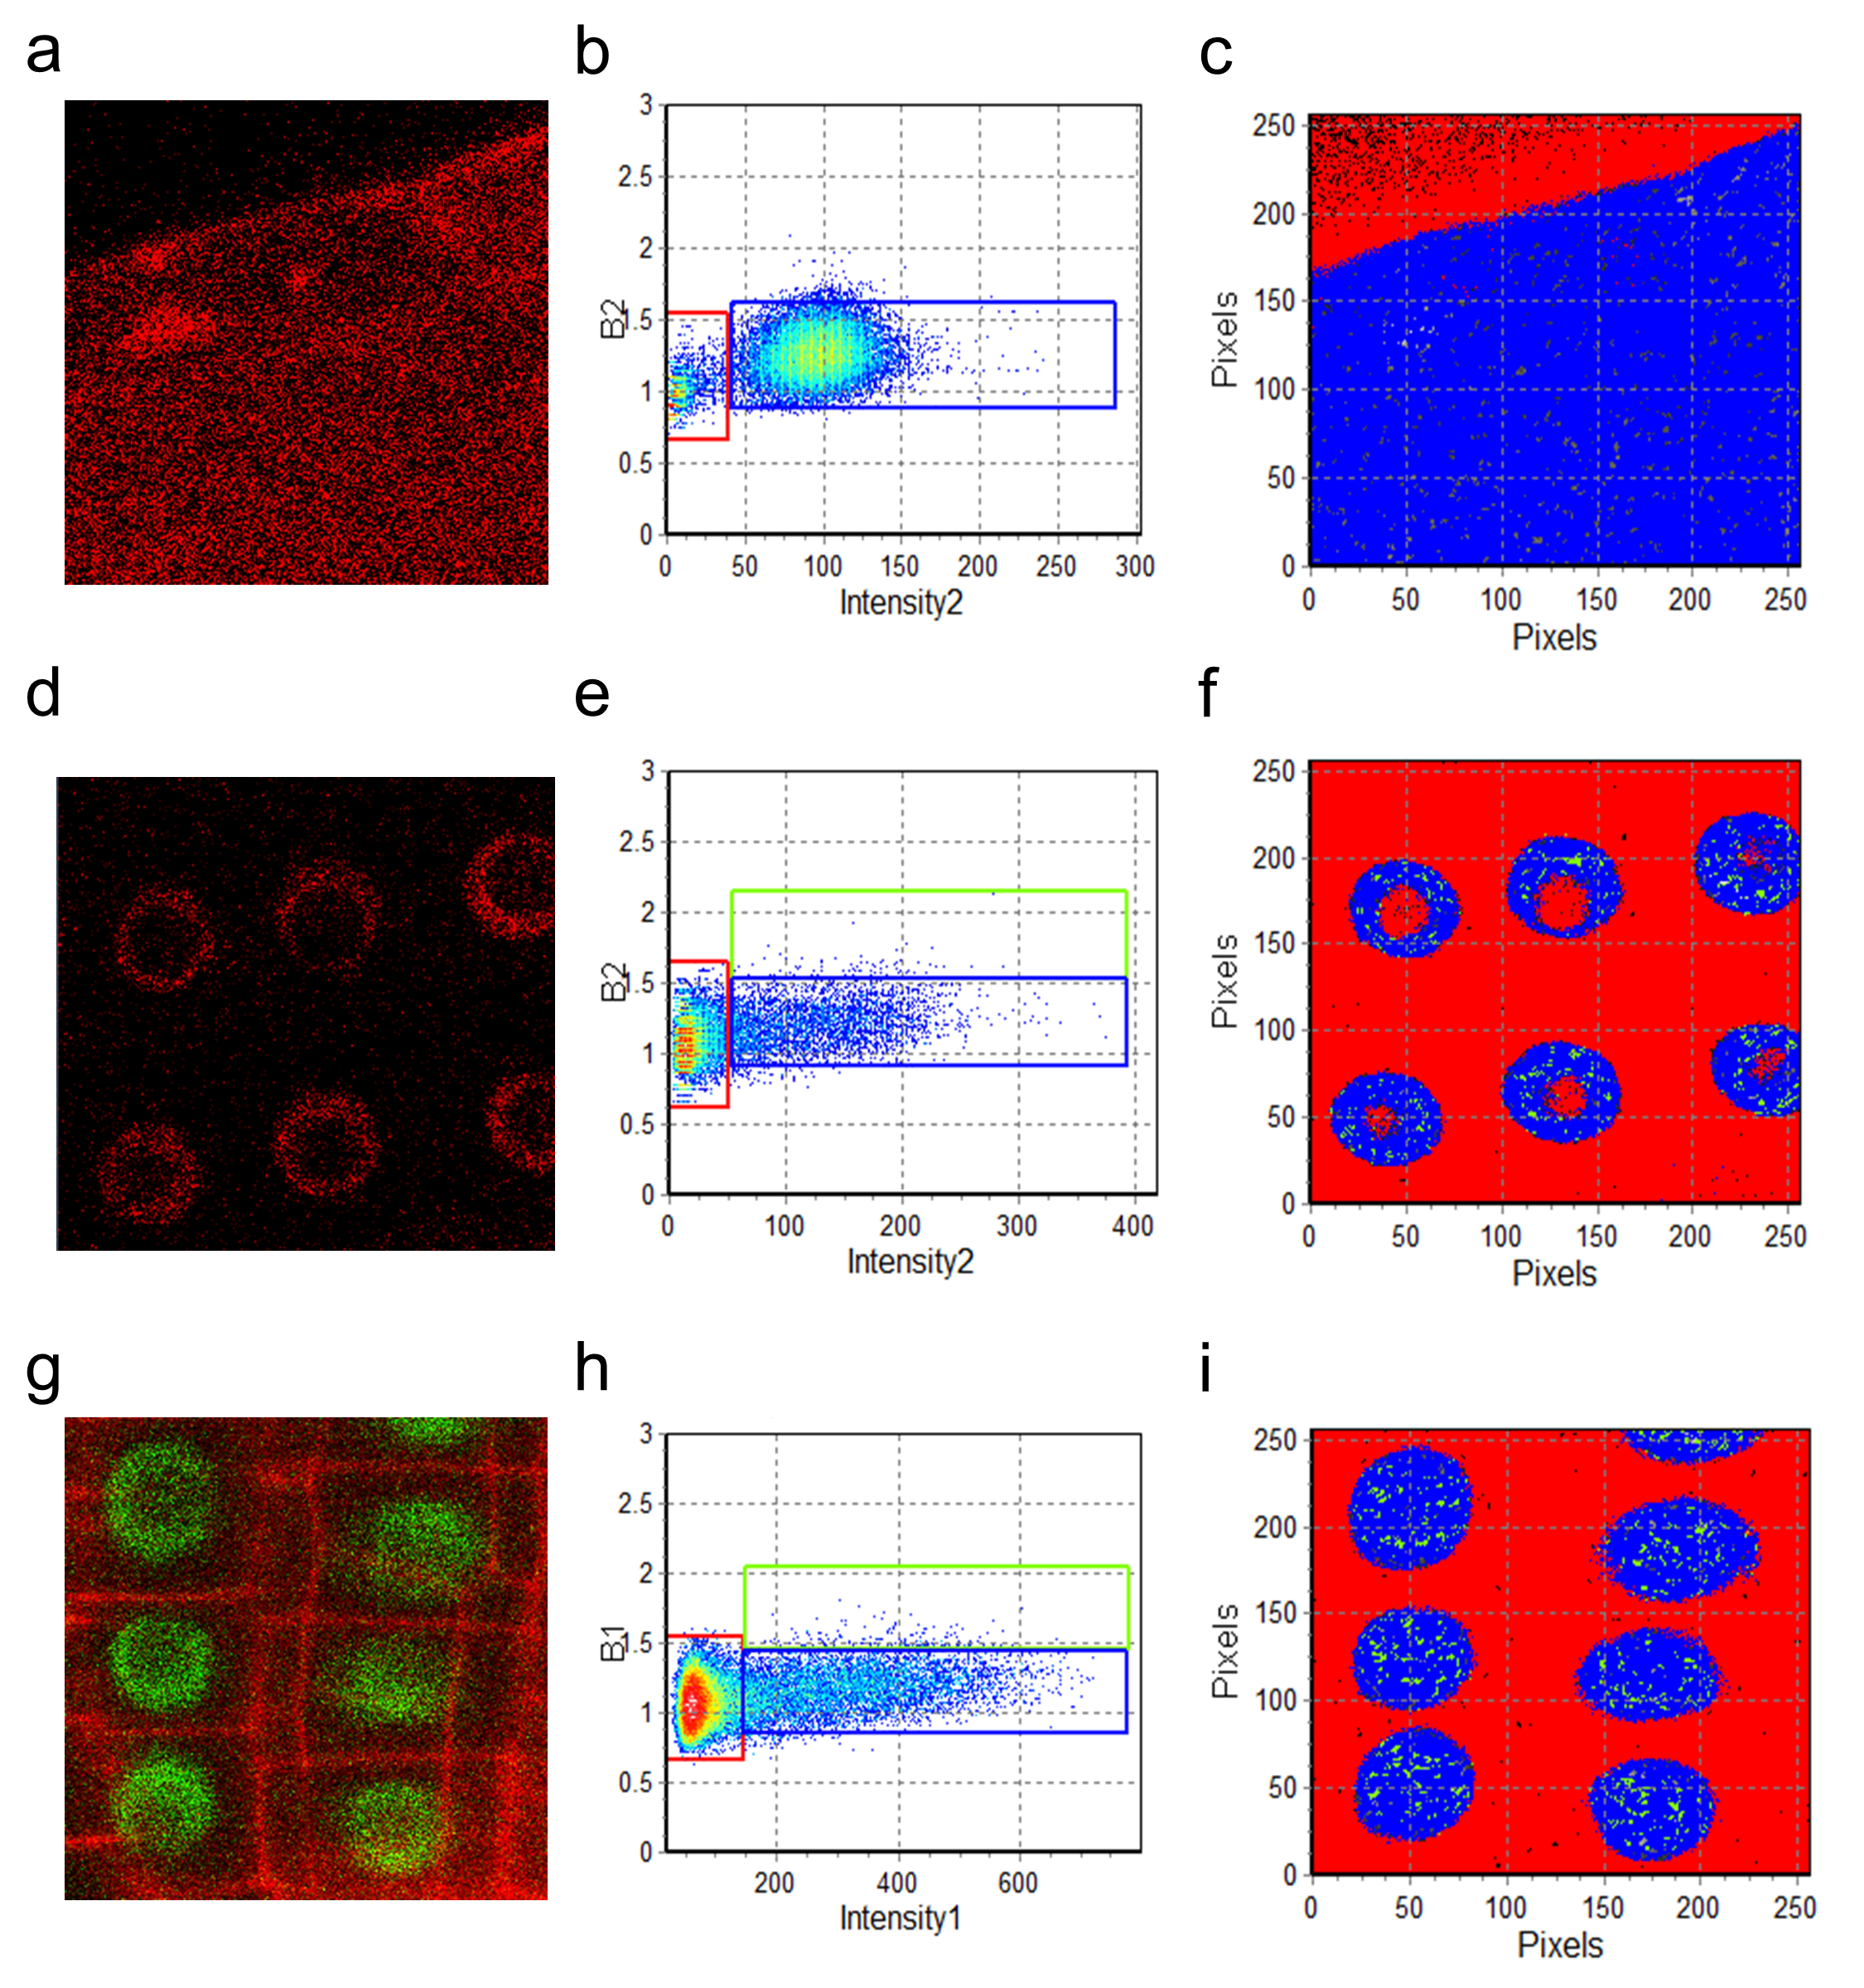

Supplement: supp [file elife-14770-supp-v1.zip › elife_poa_e14770_Figure_4_figure_supplement_2.tif]

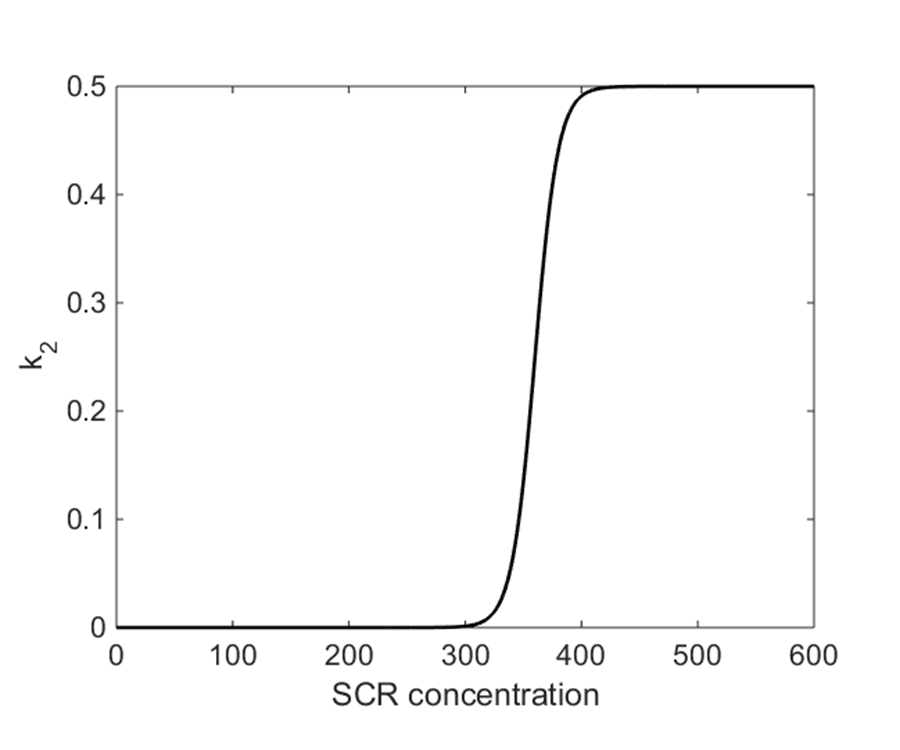

Supplement: supp [file elife-14770-supp-v1.zip › elife_poa_e14770_Figure_5_figure_supplement_2.tif]

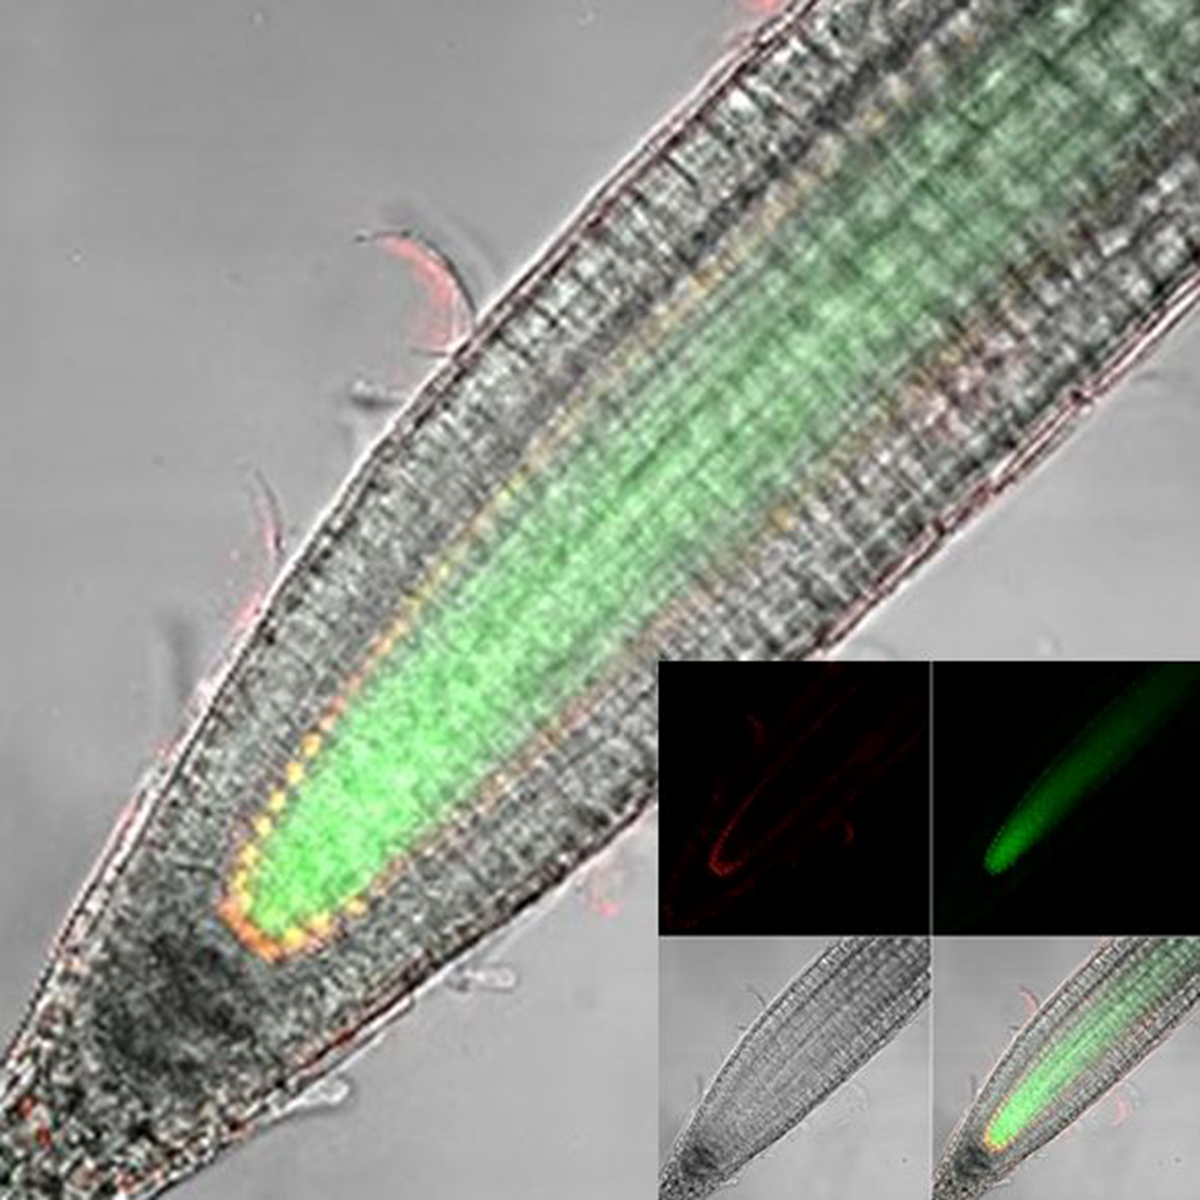

Supplement: supp [file elife-14770-supp-v1.zip › elife_poa_e14770_Figure_4_figure_supplement_1.tif]

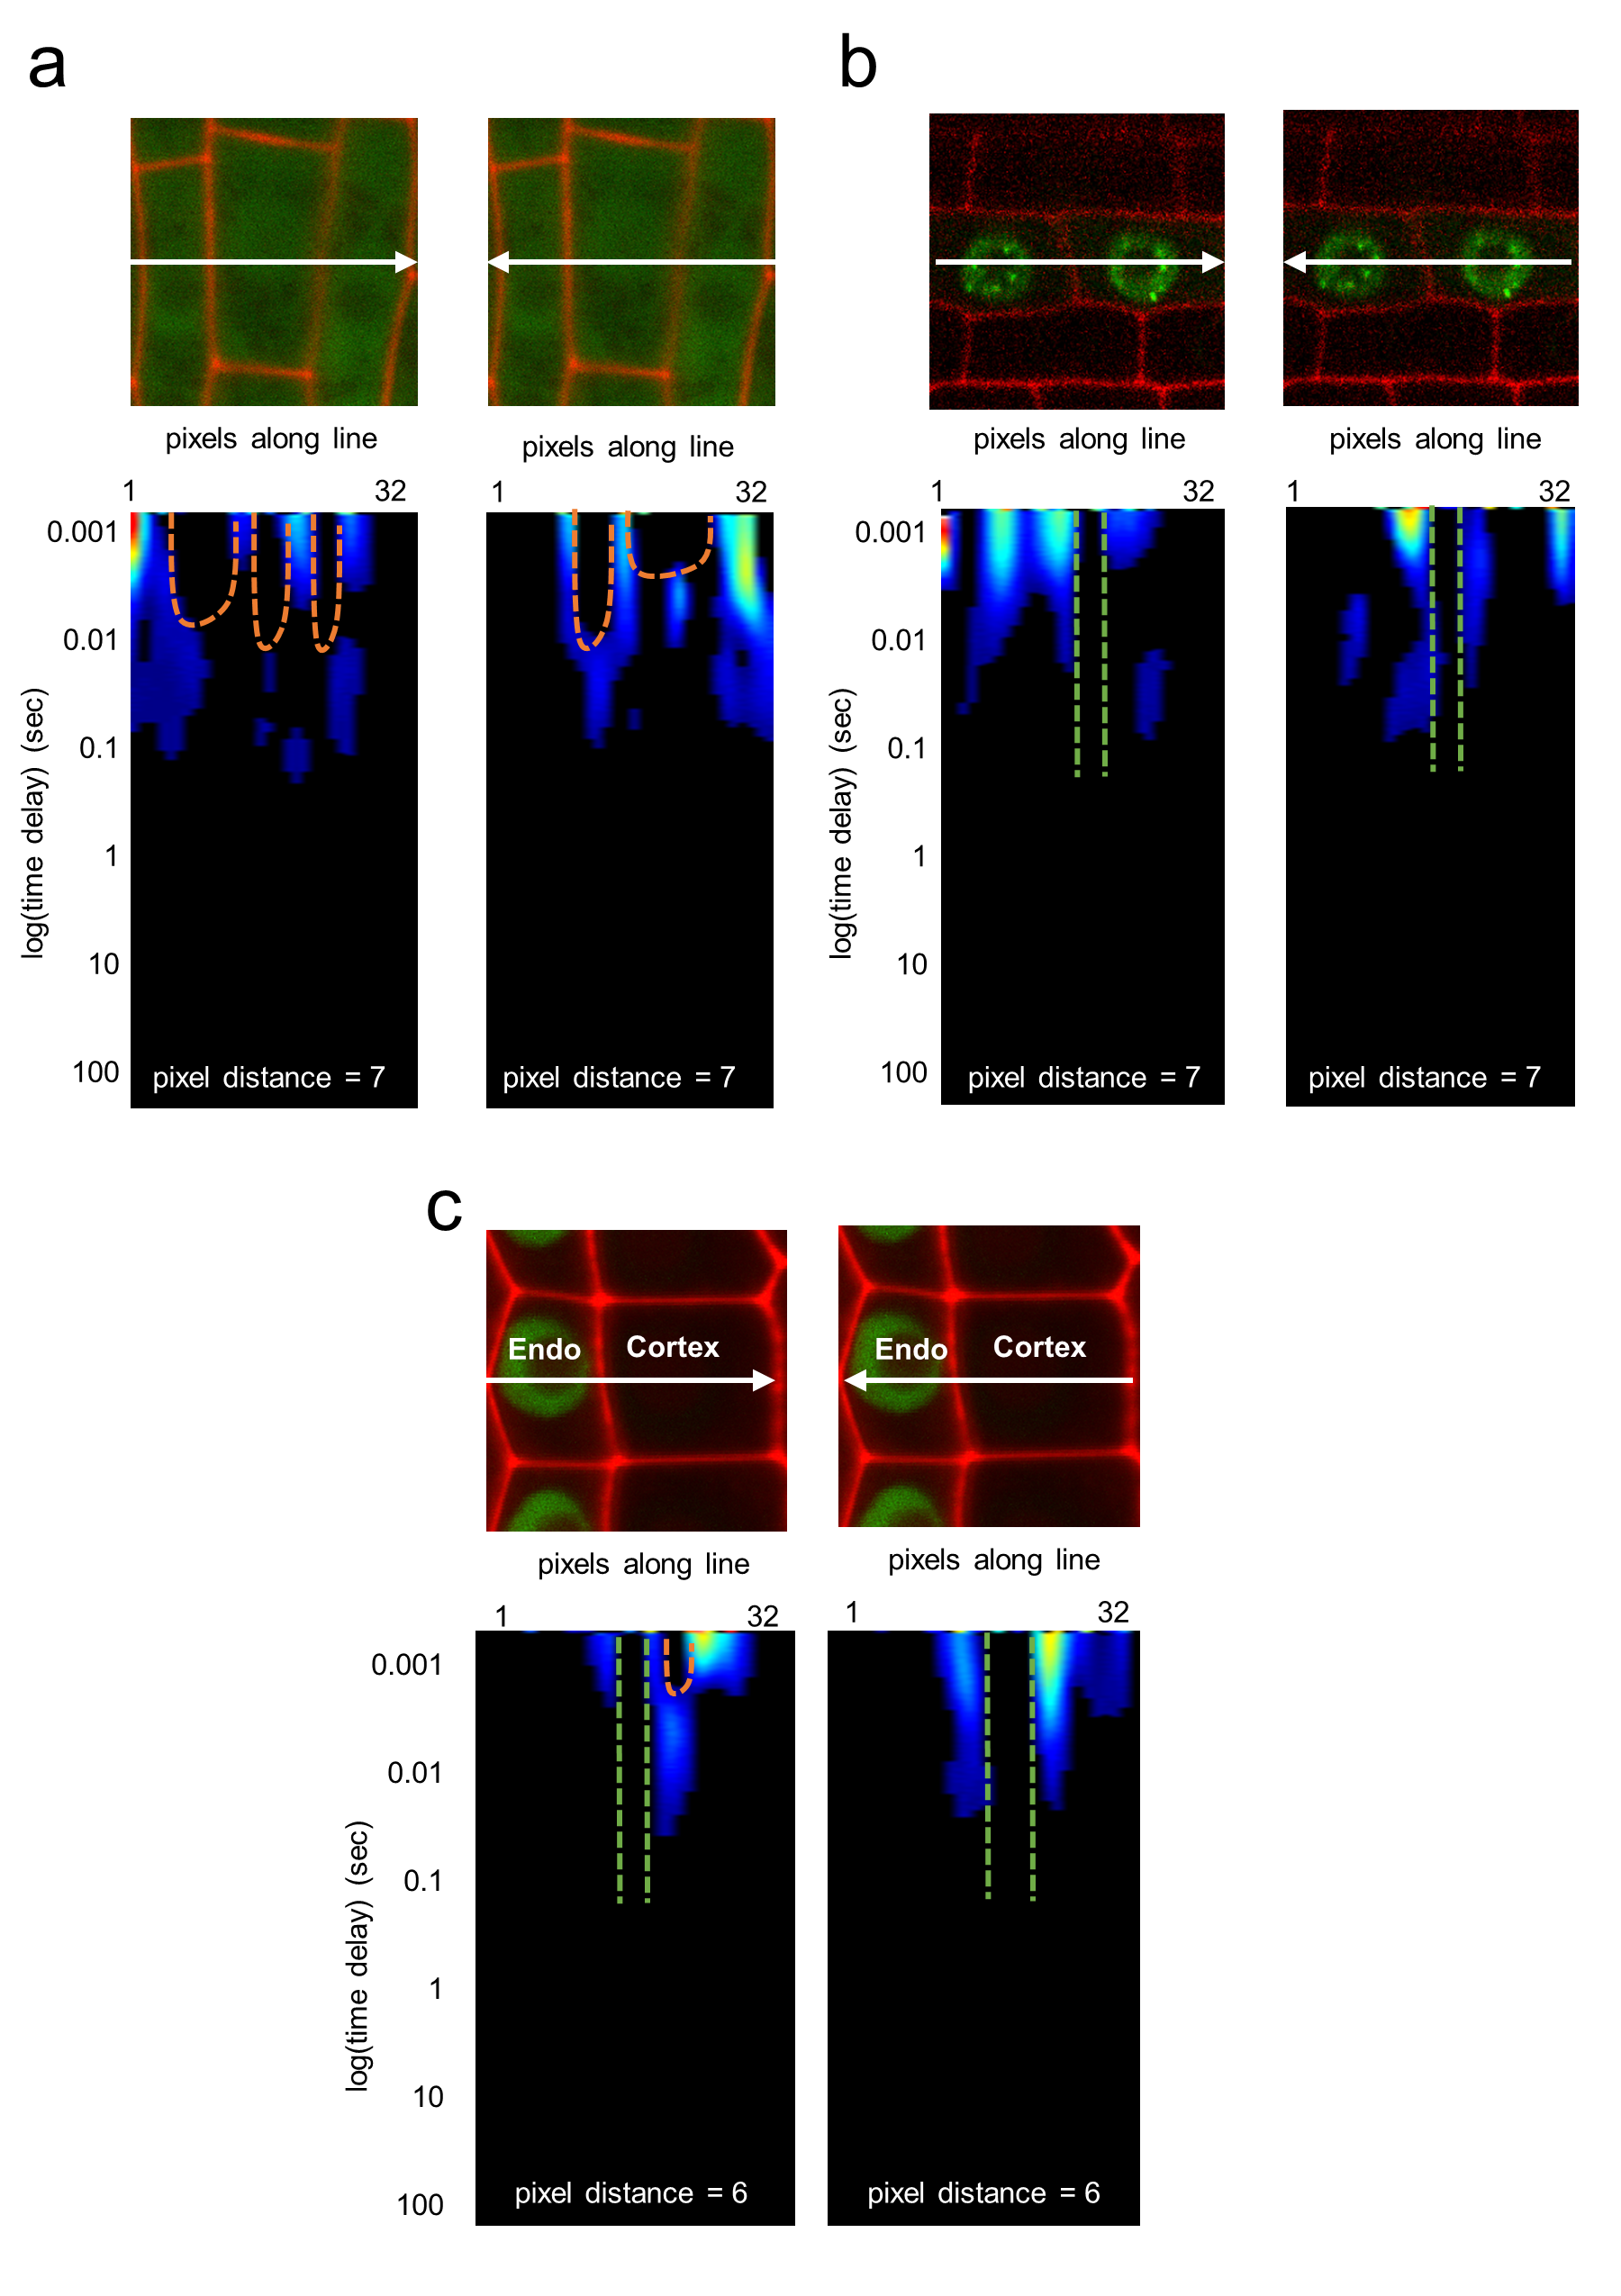

Supplement: supp [file elife-14770-supp-v1.zip › elife_poa_e14770_Figure_2_figure_supplement_1.tif]
